# Supplementary material for: Pyrogenic carbon and carbonating minerals for carbon capture and storage (PyMiCCS) part II: organic and inorganic carbon dioxide removal in an Oxisol
Source: Frontiers journal article supplement (doi:10.3389/fclim.2025.1592454), 2025-08-25
Supplement: Table_1.xlsx [file Table_1.xlsx]

## Sheet: Raw Data
Configuration	Label	pCO2	Week	Observed water flux	pH	Temperature	Electric Conductivity	Total Alkalinity	Calculated Total Alkalinity	Dissolved Organic Carbon	Dissolved Inorganic Carbon	Sodium (Na+)	Potassium (K+)	Calcium (Ca2+)	Mangesium (Mg2+)	Ammonium (NH4)	Chloride (Cl-)	Nitrate (NO3)	Sulfate (SO4)	Dissolved Silica	Saturation Index of calcite	Net TA Production Rate	Net Weathering Rate
				L per interval		°C	µS cm-1	µmol kg-1	µmol kg-1	µmol kg-1	µmol kg-1	µmol l-1	µmol l-1	µmol l-1	µmol l-1	µmol l-1	µmol l-1	µmol l-1	µmol l-1	µmol l-1		µmol g-1 week-1	log mol TAcalc m-2 s-1
RE-biochar Wood with 10% Basanite	10BaW-P	low	1	0.07575	7.62	18.6	910	4937.5	5494.8	8484.1	5745.58	1864.84	2977.44	2171.13	434.202	80.52	1569.57	352.101	814.406	133.908	0.467	44.1759	-11.4127
RE-biochar Wood with 10% Basanite	10BaW-P	low	1	0.07575	7.612	18.7	944	5046.2	5464.5	8584.01	5716.47	1927.83	3129.31	2308.82	470.514	120.034	1826.95	606.12	793.601	175.363	0.48	43.5355	-11.419
RE-biochar Wood with 50% Basanite	50BaW-P	low	1	0.07575	7.468	18.7	447	3475.4	3841.7	7998.7	4115.78	486.096	1468.9	1621.8	316.606	60.1445	211.384	29.149	274.666	254.851	0.102	3.94058	-12.0922
RE-biochar Wood with 50% Basanite	50BaW-P	low	1	0.07575	7.487	18.8	449	3785.3	4082.4	7262.69	4359.3	614.899	1446.35	1613.94	319.091	53.5145	153.998	28.0845	194.827	211.605	0.148	6.11031	-11.9017
RE-biochar Straw with 10% Basanite	10BaS-P	low	1	0.07575	8.241	18.7	3830	24796.3	26929.3	21489.2	26681.2	13793.5	22041.4	2040.24	468.858	293.848	8776.41	871.856	2124.97		1.508	457.974	-10.3613
RE-biochar Straw with 10% Basanite	10BaS-P	low	1	0.07575	8.007	18.5	2820	15983	16942	21306	17037.7	11002.2	12597.8	2653.72	602.149	310.356	8298.19	422.115	2016.74	516.354	1.26	263.544	-10.6013
Wood PyC with Basanite	W-P+Ba	low	1	0.07575	7.59	18.7	685	5540	5883.2	8165.22	6177.22	557.057	2776.63	2139.51	438.072	88.319	426.928	44.046	379.555	176.135	0.486	37.3638	-11.3387
Wood PyC with Basanite	W-P+Ba	low	1	0.07575	7.625	18.7	635	5315.2	5625.4	7662.33	5881.95	504.442	2624.44	2005.17	405.478	72.8265	304.452	37.7255	294.053	162.966	0.483	33.4776	-11.3864
Straw PyC with Basanite	S-P+Ba	low	1	0.07575	7.852	18.7	1303	8568	8966.7	10240.9	9129.72	1382.4	6233.5	2883.57	649.394	163.145	2082.54	48.763	1163.79		0.977	83.8452	-10.9876
Straw PyC with Basanite	S-P+Ba	low	1	0.07575	7.907	18.7	1464	10099.9	10594.5	10640.5	10734.3	1521.57	7689.85	2920.83	694.562	160.941	2086.93	107.987	1149.35		1.094	108.383	-10.8761
Wood PyC	W-P	low	1	0.07575	7.607	18.8	625	4438.5	4701.5	8075.3	4925.6	412.148	2217.35	2060.18	415.38	122.927	580.22	105.647	428.233	159.498	0.401	9.8244	-11.6199
Wood PyC	W-P	low	1	0.07575	7.728	18.7	740	5852.9	6383.8	7800.54	6589.52	427.806	2987.93	2323.22	470.584	113.299	446.789	92.325	413.188	167.824	0.683	22.5678	-11.2588
Straw PyC	S-P	low	1	0.07575	7.803	18.7	1336	8197.7	8576.7	10490.6	8774.3	1258.23	6609.06	2783.57	625.178	179.13	2372.47	111.312	1203.88	722.371	0.896	39.179	-11.0192
Straw PyC	S-P	low	1	0.07575	7.923	18.7	1530	10432.6	10097.4	10224.2	10221.3	1495.74	8801.63	2708.17	617.594	189.833	2309.09	107.961	1049.1		1.061	50.6983	-10.9073
Basanite	Ba	low	1	0.07575	7.476	18.7	400	3503.3	3761.4	6301.88	4026.36	392.678	1377.11	1504.44	302.308	33.151	89.3365	28.6385	87.555	215.872	0.082	2.67611	-12.1804
Basanite	Ba	low	1	0.07575	7.445	18.7	389	3233.3	3464.6	6400.13	3729.07	359.446	1323.31	1448.12	286.767	59.977	134.48	30.386	126.871	723.878	0.002	0.45033	-12.9544
Control soil	Control	low	1	0.07575	7.446	18.7	384	3317.9	3561.9	6699.03	3832.64	279.493	1359.61	1504.12	293.001	52.87	53.192	32.923	111.561	212.146	0.031
Control soil	Control	low	1	0.07575	7.408	18.7	385	3035.6	3247.2	7080.35	3518.61	278.693	1325.01	1481.61	288.788	85.4955	147.191	25.4425	203.653	230.398	-0.055
RE-biochar Wood with 10% Basanite	10BaW-P	high	1	0.07575	7.048	19.1	968	7188.1	7597.6	4396.91	9037.77	2287.1	3635.26	2159.7	448.915	106.561	1133.35	366.341	453.959	185.53	0.042	76.9118	-11.1719
RE-biochar Wood with 10% Basanite	10BaW-P	high	1	0.07575	7.032	19.1	1012	7160.3	7311.8	6766.47	8747.63	2230.23	3960.51	2237.94	459.264	133.583	1253.08	284.091	639.483	160.38	0.018	70.8716	-11.2074
RE-biochar Wood with 50% Basanite	50BaW-P	high	1	0.07575	6.81	19.1	491	4289.8	4506.6	7686.48	6032.28	560.556	1557.6	1798.18	356.813	71.9155	105.189	25.6285	192.274	229.733	-0.44	4.94161	-11.9939
RE-biochar Wood with 50% Basanite	50BaW-P	high	1	0.07575	6.813	19.2	513	4334.9	4696.3	7875.48	6269.41	667.875	1574.55	1842.3	360.045	78.5345	163.544	26.8785	239.593	233.791	-0.413	6.65162	-11.8649
RE-biochar Straw with 10% Basanite	10BaS-P	high	1	0.07575	7.186	19.1	2220	10668	11431.7	14595.3	12927.8	7645.78	8966.94	2696.57	618.615	222.351	7245.06	566.557	1825.94	558.275	0.346	145.488	-10.8594
RE-biochar Straw with 10% Basanite	10BaS-P	high	1	0.07575	7.068	19	2020	8383.4	8271.6	15278	9705.98	6346.66	6813.05	3189.39	712.147	251.265	7526.8	737.378	1822.17	384.687	0.174	83.9683	-11.0981
Wood PyC with Basanite	W-P+Ba	high	1	0.07575	6.897	19.1	630	5214.4	5571.1	7603.22	7094.91	535.114	2201.22	2106.84	437.299	98.993	279.096	30.345	332.904	219.154	-0.218	24.3102	-11.5253
Wood PyC with Basanite	W-P+Ba	high	1	0.07575	6.991	19.3	657	5411.8	5986.3	7912.94	7292.05	543.219	2245.69	2232.69	467.743	88.386	322.784	47.7325	377.44	219.167	-0.073	30.5691	-11.4258
Straw PyC with Basanite	S-P+Ba	high	1	0.07575	7.158	19.2	1417	10097.2	10723.3	8958.68	12249.1	1362.2	7374.94	2912.14	679.376	169.426	2217.38	52.4245	965.893		0.377	101.976	-10.9026
Straw PyC with Basanite	S-P+Ba	high	1	0.07575	7.25	19	1737	12002.5	12804.1	11914.4	14266.1	1622.47	10739.7	2591.41	646.332	195.101	2552.83	182.526	1064.19	671.365	0.472	133.342	-10.7861
Wood PyC	W-P	high	1	0.07575	6.992	19.3	793	6685.8	7134.2	7724.78	8678.98	416.517	3520.87	2305.15	478.381	109.621	162.219	37.519	347.293	183.796	0.006	24.0567	-11.231
Wood PyC	W-P	high	1	0.07575	6.924	19	661	5636.6	6098.4	7752.25	7663.35	420.425	2559.24	2184.31	438.733	109.888	273.05	48.861	304.368	179.073	-0.143	16.2105	-11.4025
Straw PyC	S-P	high	1	0.07575	7.176	19.1	1616	10245.1	10931.7	11231.7	12417	1591.87	8845.65	2924.56	688.363	196.524	3014.97	214.206	1273.6		0.388	52.8227	-10.8894
Straw PyC	S-P	high	1	0.07575	7.181	19.1	1486	10519.4	11174.9	10399.1	12674.9	1462.1	7509.99	3127.74	730.043	197.592	2180.2	50.1525	1169.4		0.436	54.665	-10.8745
Basanite	Ba	high	1	0.07575	6.776	19	445	4051.5	4278.9	6850.56	5855.02	401.418	1471.71	1695.55	342.439	53.9285	55.667	29.4595	111.121	271.472	-0.514	2.40351	-12.227
Basanite	Ba	high	1	0.07575	6.765	19.2	447	4114.9	4370.7	6654.9	6016.36	390.776	1475.52	1701.33	344.223	61.4375	35.5915	21.983	107.704	271.352	-0.512	3.09194	-12.1177
Control soil	Control	high	1	0.07575	6.745	19.2	427	3819	4091.8	6768.13	5709.06	289.793	1442.98	1652.12	323.554	42.7105	24.1165	24.505	137.116	255.607	-0.569
Control soil	Control	high	1	0.07575	6.71	19	416	3554.2	3825	6846.4	5472.31	284.813	1384	1587.36	312.458	97.906	82.249	16.59	180.213	269.837	-0.652
RE-biochar Wood with 10% Basanite	10BaW-P	low	2	0.07575	7.674	19.3	835	7681.1		5351.89		1857.69	3042	2263.59	463.938	25.044	541.8	54.818	180.921	153.187
RE-biochar Wood with 10% Basanite	10BaW-P	low	2	0.07575	7.709	19.5	878	8108.9	8494.8	4513.48	8778.5	1856.58	3131.76	2419.56	507.543	41.6643	543.642	54.5667	214.165	151.932	0.801	66.3869	-11.2358
RE-biochar Wood with 50% Basanite	50BaW-P	low	2	0.07575	7.585	19.6	646	6014.6	6272.7	4319.48	6581.33	692.411	1822.08	2356.98	513.248	74.48	399.489	55.5013	110.59	182.608	0.569	8.285	-11.7695
RE-biochar Wood with 50% Basanite	50BaW-P	low	2	0.07575	7.593	19.7	662	6283.7	6565.4	4482.67	6879.67	761.558	1846.29	2412.62	511.701	56.98	398.631	59.019	57.846	221.678	0.606	10.9235	-11.6494
RE-biochar Straw with 10% Basanite	10BaS-P	low	2	0.07575	8.067	19.9	2090	18275.6	18310.4	10523.9	18360.2	7919.46	10877.7	1838.73	503.367	201.869	2372.66	47.0583	498.614	1198.61	1.261	252.24	-10.6204
RE-biochar Straw with 10% Basanite	10BaS-P	low	2	0.07575	8.022	19.7	2160	19546.7	19650.2	11939.4	19753.3	8809.02	10542.4	2134.78	546.74	206.02	2212.86	42.5973	411.091	837.016	1.303	278.323	-10.5776
Wood PyC with Basanite	W-P+Ba	low	2	0.07575	7.701	20.3	788	7409	7932.2	4996.38	8194.87	614.204	2820.86	2643.38	568.077	25.9613	535.182	46.0887	83.5955	195.472	0.822	38.8705	-11.3215
Wood PyC with Basanite	W-P+Ba	low	2	0.07575	7.677	19.8	791	7469.7	7763.1	5087.13	8044.5	616.689	2743.89	2629.91	581.07	89.4957	561.395	51.5803	56.0795	179.776	0.782	36.3214	-11.3509
Straw PyC with Basanite	S-P+Ba	low	2	0.07575	7.837	20.3	1238	11458.4	11565	5883.92	11774.6	1369.04	5946.77	2920.2	701.712	111.935	920.689	40.042	204.224	751.254	1.113	93.6322	-10.9397
Straw PyC with Basanite	S-P+Ba	low	2	0.07575	7.82	19.6	1292	11940.2	12072.5	6595.79	12319.7	1402.58	6663.89	2843.31	691.51	142.802	912.507	40.9677	200.037	868.548	1.091	101.282	-10.9056
Wood PyC	W-P	low	2	0.07575	7.624	19.9	704	6545.1	6851.1	3735	7147.38	373.421	2347.8	2503.98	529.63	65.0613	413.027	48.5367	132.919	186.362	0.667	11.3436	-11.5575
Wood PyC	W-P	low	2	0.07575	7.815	20.2	849	8153.4	8421.8	3645.92	8594.52	455.416	3034.48	2910.66	605.781	35.2147	429.965	70.6277	114.056	207.707	0.99	23.2416	-11.246
Straw PyC	S-P	low	2	0.07575	7.826	19.4	1183	10386.7	11151.6	5894.74	11379.2	1161.87	5778.03	2777.03	668.864	61.2433	937.773	53.7943	261.325	856.494	1.058	43.9198	-10.9696
Straw PyC	S-P	low	2	0.07575	7.892	19.4	1367	12551.7	13214.6	5239.49	13408.8	1308.71	7836.91	2677.31	661.585	69.837	842.854	56.1173	218.187	1054.67	1.163	59.5471	-10.8374
Basanite	Ba	low	2	0.07575	7.528	19.5	566	5190.4	5551.3	4542.62	5877.52	542.639	1665.77	2073.14	474.788		381.718	42.4263	30.929	225.574	0.419	1.4826	-12.4369
Basanite	Ba	low	2	0.07575	7.539	19.7	564	5287.1	5614.1	4427.72	5933.01	505.661	1664.42	2088.65	461.987	5.05067	320.525	43.5543	42.4105	218.552	0.441	1.95355	-12.3171
Control soil	Control	low	2	0.07575	7.526	19.2	560	5094.8	5514.2	4647.52	5840.85	336.795	1678.8	2194.67	460.202	2.944	319.41	63.292	33.5215	199.883	0.434
Control soil	Control	low	2	0.07575	7.545	19.9	600	4809.3	5193	5102.95	5482.97	378.176	1626.4	1983.04	421.733	68.02	374.138	37.5203	66.862	217.509	0.399
RE-biochar Wood with 10% Basanite	10BaW-P	high	2	0.07575	7.191	20.3	1038	9901.5	10686.4	2650.14	12083.3	2103.46	3888.03	2724.62	591.208	2.242	489.261	58.1117	281.947	219.028	0.429	78.6004	-11.1624
RE-biochar Wood with 10% Basanite	10BaW-P	high	2	0.07575	7.064	19.9	1020	9964.8	10577.6	3670.06	12461.3	2116.74	3739.95	2716.68	580.649	60.7713	424.83	52.8857	191.982	224.447	0.296	76.301	-11.1753
RE-biochar Wood with 50% Basanite	50BaW-P	high	2	0.07575	6.9	19.9	716	7077	7515.8	4724.95	9506.41	729.933	1903.84	2602.51	573.999	78.4977	284.99	56.5817	44.573	211.828	0.004	4.94432	-11.9937
RE-biochar Wood with 50% Basanite	50BaW-P	high	2	0.07575	6.884	19.8	725	7142.8	7434.8	4779.07	9481.03	902.177	1915.99	2616.62	563.113	95.6037	295.674	52.623	72.4735	228	-0.017	4.21416	-12.0631
RE-biochar Straw with 10% Basanite	10BaS-P	high	2	0.07575	7.271	20	1819	15324.8	15866.2	8121.09	17547.5	6613.51	7554.2	2584.47	634.379	217.654	2693.32	55.687	548.865	733.606	0.591	173.242	-10.7835
RE-biochar Straw with 10% Basanite	10BaS-P	high	2	0.07575	7.271	20.4	1660	13863.5	14636.9	7900.46	16181.1	5948.58	6313.81	2676.7	632.839	214.697	2549.12	63.3607	516.043	551.889	0.588	149.31	-10.8481
Wood PyC with Basanite	W-P+Ba	high	2	0.07575	7.007	20.3	852	8351.4	8952.1	4464.35	10767.1	670.538	2644.26	2935.49	677.352	130.495	422.698	42.9733	71.834	248.55	0.223	29.9194	-11.4352
Wood PyC with Basanite	W-P+Ba	high	2	0.07575	6.993	20.2	884	8597.6	9083.1	5037.18	10984.8	661.065	2639.97	3046.28	705.995	174.015	433.697	43.301	71.502	259.255	0.227	31.8941	-11.4074
Straw PyC with Basanite	S-P+Ba	high	2	0.07575	7.148	19.7	1389	12551.2	13007.5	5595.84	14878.8	1337.33	6670.83	3201.27	792.222	209.768	1123.79	44.31	373.573	1024.59	0.502	91.0515	-10.9518
Straw PyC with Basanite	S-P+Ba	high	2	0.07575	7.151	19.9	1411	12578.1	13322.7	7276.84	15232.1	1392.52	7831.88	2718.01	699.871	162.765	1092.32	43.0367	317.584	1269.97	0.451	95.8029	-10.9297
Wood PyC	W-P	high	2	0.07575	6.988	19.8	872	8452.1	9227.7	4176.28	11203.4	402.395	3334.94	2839.86	612.886	70.2723	364.513	44.2237	104.728	206.136	0.195	17.1225	-11.3787
Wood PyC	W-P	high	2	0.07575	6.949	20	824	8214.9	8866.5	4680.83	10942.9	424.216	2885.9	2818.04	627.698	89.2983	239.345	47.7463	52.265	198.088	0.144	14.3864	-11.4543
Straw PyC	S-P	high	2	0.07575	7.161	20	1388	12901	13724.4	6537.5	15638.2	1377.44	7421.44	2891.19	706.275	142.444	799.676	54.51	222.915	1003.27	0.502	51.185	-10.9031
Straw PyC	S-P	high	2	0.07575	7.15	20.2	1356	12730.9	13697.7	5878.92	15649.4	1312.63	6875.79	3033.34	729.074	150.245	747.628	52.8797	174.344	802.068	0.515	50.9828	-10.9048
Basanite	Ba	high	2	0.07575	6.806	19.9	597	5917.7	6332.9	4933.1	8440.84	522.931	1716.71	2254.02	504.398	37.5213	144.565	41.2783	38.65	273.895	-0.208	-4.75752
Basanite	Ba	high	2	0.07575	6.852	20.1	636	6336.9	6891.9	4440.21	8938.15	537.715	1757.87	2403.38	544.186	64.7237	151.907	46.5977	37.529	264.7	-0.103	-0.565443
Control soil	Control	high	2	0.07575	6.876	20.1	640	6366.4	6967.9	5007.2	8921.8	344.332	1791.56	2490.03	550.58	115.462	89.6597	63.052	41.4585	244.72	-0.06
Control soil	Control	high	2	0.07575	6.918	20.4	634	6304.2	6966.7	4060.55	8732.44	340.174	1776.8	2401.06	525.785	169.382	95.7157	28.6953	67.961	221.039	-0.029
RE-biochar Wood with 10% Basanite	10BaW-P	low	3	0.07575	7.693	19.7	954	8955	9333.8	3628.43	9670.43	1971.43	3132.62	1934.65	533.657	26.759	407.423	91.9877	48.2853	127.804	0.74	26.3132	-11.6377
RE-biochar Wood with 10% Basanite	10BaW-P	low	3	0.07575	7.724	20.1	971	9789.4	10089.8	2972.35	10408.9	1760.57	3329.04	2167.58	622.959	27.21	338.759	70.8037	83.332	137.948	0.847	42.2907	-11.4316
RE-biochar Wood with 50% Basanite	50BaW-P	low	3	0.07575	7.656	20.2	784	7907.8	8528.4	3072.26	8862.03	803.176	1975.33	2283.47	699.908	48.7995	218.643	141.443	25.708	141.231	0.75	3.96312	-12.0898
RE-biochar Wood with 50% Basanite	50BaW-P	low	3	0.07575	7.679	20.3	845	8836.4	9270.8	3499.38	9600.54	811.226	2077.95	2536.75	778.978	59.4895	205.663	130.887	13.017	146.146	0.845	10.6553	-11.6602
RE-biochar Straw with 10% Basanite	10BaS-P	low	3	0.07575	7.966	20.3	1874	18043.4	17971.4	6143.69	18166	6686.27	9120.39	1491.9	622.405	132.25	963.577	134.6	194.954	1048.41	1.094	192.393	-10.738
RE-biochar Straw with 10% Basanite	10BaS-P	low	3	0.07575	7.972	20.1	1981	19592.1	20483.1	7545.77	20693.4	7672.29	9479.77	1644.85	566.81	80.235	883.477	139.856	137.515	605.716	1.18	241.29	-10.6396
Wood PyC with Basanite	W-P+Ba	low	3	0.07575	7.677	20.3	934	9428.1	9779.5	4332.8	10129	714.998	2936.12	2572.46	797.616	23.622	398.511	88.8907	19.118	139.977	0.865	25.4868	-11.5048
Wood PyC with Basanite	W-P+Ba	low	3	0.07575	7.698	20.2	965	9871.8	10280.5	4242.05	10619.8	733.041	2928.42	2690.5	836.557	76.171	376.244	141.079	11.7833	132.665	0.919	33.039	-11.3921
Straw PyC with Basanite	S-P+Ba	low	3	0.07575	7.836	20.3	1359	13504.9	14214	4699.98	14477	1411.99	6066.17	2759.57	880.072	92.793	492.66	100.945	58.9333	498.366	1.166	92.3335	-10.9457
Straw PyC with Basanite	S-P+Ba	low	3	0.07575	7.911	20.3	1405	14133.8	14752.3	5053.83	14929.1	1389.03	6772.2	2662.09	875.516	134.659	508.547	105.427	42.9527	568.28	1.234	100.448	-10.9092
Wood PyC	W-P	low	3	0.07575	7.64	20.3	804	8087.1	8350.6	3056.44	8693.25	397.251	2423.81	2312.74	666.394	41.664	281.329	43.0083	59.7567	142.16	0.732	1.98351	-12.3148
Wood PyC	W-P	low	3	0.07575	7.733	20	961	9966.4	10351.6	2375.38	10652.9	416.753	3072.13	2824.99	753.014	94.894	252.622	81.4833	47.9297	164.533	0.973	17.1411	-11.3782
Straw PyC	S-P	low	3	0.07575	7.861	20	1285	12904.5	12986.2	4581.75	13204.5	1115.43	5848.2	2606.69	838.414	95.325	423.317	110.312	63.4147	585.303	1.133	37.0982	-11.0429
Straw PyC	S-P	low	3	0.07575	7.876	20.3	1352	13376.3	13737.1	3685.05	13958.8	1042.96	7172.16	2321.01	749.559	77.193	376.69	103.026	93.064	772.114	1.122	42.7863	-10.9809
Basanite	Ba	low	3	0.07575	7.629	20.2	766	9248.9	7917.7	3660.07	8255.67	669.075	1894.61	2261.39	703.746		149.159	135.44	11.4043	152.565	0.694	-1.28275
Basanite	Ba	low	3	0.07575	7.688	20.2	772	8034.6	8433.2	3833.25	8730.48	626.71	1916.2	2303.47	736.698	30.4425	150.99	105.717	10.2233	152.164	0.782	2.58312	-12.1957
Control soil	Control	low	3	0.07575	7.731	19.9	786	8137.2	8448.8	3802.44	8705.32	387.075	1969.88	2463.81	764.274		136.257	205.235	10.2297	125.813	0.847
Control soil	Control	low	3	0.07575	7.578	20.1	708	7276	7728.7	4012.26	8115	371.928	1874.89	2146.74	669.613	25.9345	154.651	81.745	13.393	137.872	0.615
RE-biochar Wood with 10% Basanite	10BaW-P	high	3	0.07575	7.029	20.3	1090	10900.2	11558.9	1778.41	13784.7	1905.89	3769.52	2438.89	702.244		204.13	40.268	157.786	172.118	0.258	40.6729	-11.4486
RE-biochar Wood with 10% Basanite	10BaW-P	high	3	0.07575	7.074	20.5	1115	11321.2	11970.5	2293.79	14032	1980.66	3720.23	2515.5	742.072	47.3815	286.05	66.4033	99.4453	170.039	0.331	49.3717	-11.3644
RE-biochar Wood with 50% Basanite	50BaW-P	high	3	0.07575	6.964	20.2	922	9721.1	10230.1	3730.84	12524.3	892.471	2123.75	2822.12	883.024	38.503	169.526	191.408	12.5777	166.391	0.214	5.36979	-11.9578
RE-biochar Wood with 50% Basanite	50BaW-P	high	3	0.07575	6.938	20.2	911	9648.1	9915.6	3744.16	12282.5	959.805	2155.2	2764.87	850.712	38.0205	160.205	144.555	15.0857	169.048	0.169	2.53481	-12.2839
RE-biochar Straw with 10% Basanite	10BaS-P	high	3	0.07575	7.277	20.2	1867	18188	18427.8	5489.27	20350.1	6634.97	7348.53	2331.74	815.984	145.911	1195.06	152.249	232.744	588.68	0.62	171.188	-10.7887
RE-biochar Straw with 10% Basanite	10BaS-P	high	3	0.07575	7.186	20.1	1743	16568.7	17258.8	5490.94	19508.5	6191.92	6418.02	2424.76	818.601	126.4	1230.77	157.756	248.27	425.262	0.525	148.43	-10.8507
Wood PyC with Basanite	W-P+Ba	high	3	0.07575	6.949	20.5	1001	10582.1	10831.1	3406.96	13323.6	747.774	2790.53	2952.54	935.47	111.88	301.142	122.949	16.3317	172.192	0.239	18.0394	-11.6549
Wood PyC with Basanite	W-P+Ba	high	3	0.07575	6.949	20.4	1048	10849.7	11117.5	3943.98	13673.3	733.9	2797.06	3070.87	982.138	100.127	305.763	162.399	14.8093	165.598	0.262	22.3566	-11.5617
Straw PyC with Basanite	S-P+Ba	high	3	0.07575	7.1	20.4	1453	14426.2	14795.5	4367.77	17153.7	1534.26	6445.45	2962.16	996.276	261.08	721.928	99.4607	140.85	617.698	0.484	77.7997	-11.0201
Straw PyC with Basanite	S-P+Ba	high	3	0.07575	7.098	20.7	1430	13972	14490.3	5057.99	16820.9	1360.53	7156.03	2452.37	868.96	195.623	509.062	76.657	98.4343	939.892	0.405	73.1991	-11.0466
Wood PyC	W-P	high	3	0.07575	6.947	20.2	998	10299.5	10459.6	3813.27	12899.3	406.813	3291.68	2820.02	825.604	79.629	232.146	91.0553	29.301	140.824	0.203	6.25089	-11.8163
Wood PyC	W-P	high	3	0.07575	6.949	20.3	975	10117.6	10495.9	3907.35	12928.4	432.453	2960.04	2831.64	863.866	62.8755	188.107	123.607	12.8057	141.725	0.211	6.52586	-11.7976
Straw PyC	S-P	high	3	0.07575	7.128	20.9	1481	14957.1	15367.8	5087.96	17740.2	577.668	3274.28	1271.89	413.254	91.4205	154.289	52.905	22.726	763.445	0.214	43.4305	-10.9745
Straw PyC	S-P	high	3	0.07575	7.139	20.6	1474	14940.3	15250.1	4858.17	17563	483.165	2744.53	1178.43	398.457	63.0845	138.087	53.4103	15.449	631.375	0.189	42.5389	-10.9835
Basanite	Ba	high	3	0.07575	6.971	21.1	833	8437.1	9170.6	3645.08	11183.1	653.329	1941.19	2448.74	827.704		107.983	182.642	13.2683	192.215	0.14	-3.47815
Basanite	Ba	high	3	0.07575	6.969	20.7	883	9102.5	9577.1	3815.76	11693.2	626.233	1987.29	2637.67	860.239	55.7415	114.45	132.502	12.5533	178.953	0.177	-0.429707
Control soil	Control	high	3	0.07575	6.969	20.7	925	9942.4	10329.6	3993.94	12595.3	394.025	2121.53	2990.03	966.2	34.3655	71.4835	123.764	8.61467	151.5	0.253
Control soil	Control	high	3	0.07575	6.943	20.5	804	8554.1	8939.2	3543.51	11055.7	341.591	1988.42	2491.92	766.643	115.816	63.889	86.2037	18.3127	158.75	0.103
RE-biochar Wood with 10% Basanite	10BaW-P	low	4	0.07575	7.714	20.5	979	10022.7	10509.9	3128.04	10835.5	1873.24	3301.93	2804.76	636.478	13.3075	298.443	95.4115	20.0265	173.675	0.961	10.9074	-12.0201
RE-biochar Wood with 10% Basanite	10BaW-P	low	4	0.07575	7.78	20.4	1024	10768.1	11363.2	2556.05	11627.2	1591.45	3480.14	3124.13	726.425	44.1063	273.24	62.611	36.237	199.651	1.093	28.9412	-11.5963
RE-biochar Wood with 50% Basanite	50BaW-P	low	4	0.07575	7.682	20.6	865	9141	9674.4	2748.38	9997.71	780.979	2073.76	3271.12	820.451	27.9133	115.818	131.829	16.1155	178.022	0.966	-2.87915
RE-biochar Wood with 50% Basanite	50BaW-P	low	4	0.07575	7.772	20.7	951	10294	10993.3	3217.13	11239.1	758.05	2235.93	3707.55	929.556	9.9675	96.6563	145.128	16.4205	201.512	1.147	9.00974	-11.7331
RE-biochar Straw with 10% Basanite	10BaS-P	low	4	0.07575	7.946	20.8	1780	17956.6	18895	4883.15	19076.2	5887.6	8587.46	2444.46	727.762	65.371	645.328	136.007	116.721	1300.79	1.307	173.286	-10.7834
RE-biochar Straw with 10% Basanite	10BaS-P	low	4	0.07575	8.018	20.9	1984	19523.1	19558.3	5918.89	19634.6	6694.23	9345.58	2484.81	673.402	12.586	513.635	181.152	55.1515	697.193	1.392	186.199	-10.7522
Wood PyC with Basanite	W-P+Ba	low	4	0.07575	7.755	20.9	1063	11567.4	11912.6	3625.93	12196	739.762	3140.88	3749.63	953.4	77.7893	256.803	95.846	17.378	200.852	1.163	28.9245	-11.4498
Wood PyC with Basanite	W-P+Ba	low	4	0.07575	7.752	20.7	1090	11610.5	12263.2	3756.65	12558.5	723.18	3164.53	3876.27	1008.27	31.3457	213.573	150.084	16.5725	195.64	1.18	34.2095	-11.377
Straw PyC with Basanite	S-P+Ba	low	4	0.07575	7.9	20.7	1448	15313.3	15783.5	4215.41	15934.6	1276.28	6386.42	3881.96	1065.1	97.4447	311.005	101.385	23.548	694.208	1.401	87.2754	-10.9702
Straw PyC with Basanite	S-P+Ba	low	4	0.07575	7.76	20.7	1505	15879.2	16202.8	4316.98	16579	1241.52	7003.42	3845.74	1081.74	136.136	309.436	78.1283	20.259	857.856	1.272	93.596	-10.9398
Wood PyC	W-P	low	4	0.07575	7.767	20.2	900	9471.1	9998	2783.35	10238.4	402.559	2604.46	3398.63	798.725	52.617	250.567	44.2943	30.9275	375.647	1.069	0.031815	-14.1096
Wood PyC	W-P	low	4	0.07575	7.715	20.3	1011	10851.4	11039.9	2184.72	11358.9	374.195	3168.39	3768.1	850.057	32.4557	174.635	49.6317	28.1645	439.154	1.093	7.92421	-11.7133
Straw PyC	S-P	low	4	0.07575	7.815	20.2	1372	14447.1	14750.5	4083.03	15018.9	991.506	6030.03	3820.85	1022.9	82.0007	258.926	123.854	24.2255	501.718	1.286	36.032	-11.0556
Straw PyC	S-P	low	4	0.07575	7.89	20.6	1368	14122.1	14486.8	3190.49	14663.1	895.29	7091.57	3300.39	864.182	64.879	251.791	79.9143	45.076	705.768	1.298	34.0345	-11.0803
Basanite	Ba	low	4	0.07575	7.721	20.3	940	9974.4	10181.9	3199.65	10470.8	769.878	2144.91	3614.04	968.637	2.4765	109.149	175.762	21.4715	140.594	1.054	1.41061	-12.4585
Basanite	Ba	low	4	0.07575	7.44	20.5	912	9858.7	9751.6	3337.02	10421.1	707.411	2125.69	3532.77	928.192	3.846	119.958	123.94	19.321	141.388	0.758	-1.81632
Control soil	Control	low	4	0.07575	7.682	20.3	947	10254.7	10424.7	3259.59	10762.2	335.442	2186.3	3866.14	1032.43		52.6757	199.057	16.569	117.07	1.051
Control soil	Control	low	4	0.07575	7.628	20.4	875	9275.8	9562.9	3613.44	9943.56	351.362	2140.09	3504.68	892.25	20.057	56.6247	114.771	15.2005	130.288	0.933
RE-biochar Wood with 10% Basanite	10BaW-P	high	4	0.07575	7.08	20.5	1142	12185.4	12540.1	1720.13	14638.4	1729.26	3900.39	3482.92	769.428		108.277	14.741	92.163	166.547	0.483	25.1107	-11.658
RE-biochar Wood with 10% Basanite	10BaW-P	high	4	0.07575	7.073	20.5	1155	12298.2	12553.9	1870.83	14687.5	1737.77	3871.17	3515.56	794.669	20.332	195.519	53.7467	59.041	167.694	0.48	25.4023	-11.653
RE-biochar Wood with 50% Basanite	50BaW-P	high	4	0.07575	7.054	20.6	1096	12067.7	12423	3555.16	14606.5	897.765	2347.51	4196.59	1110.22	7.896	79.5995	128.1	18.102	504.65	0.53	9.65471	-11.7031
RE-biochar Wood with 50% Basanite	50BaW-P	high	4	0.07575	7.049	20.6	1048	11441.2	11572.7	3183	13638.3	848.834	2343.47	4069.74	1032.41	14.0583	74.926	176.784	17.233	508.121	0.488	1.9899	-12.389
RE-biochar Straw with 10% Basanite	10BaS-P	high	4	0.07575	7.315	20.5	1944	20306.7	20543	4348.62	22442	6470.23	7655.79	3481.05	970.807	172.165	775.568	131.922	124.007	570.228	0.863	178.929	-10.7695
RE-biochar Straw with 10% Basanite	10BaS-P	high	4	0.07575	7.274	20.7	1842	19074.5	26487.5	4306.16	29181	6216	6816.07	3536.48	952.775	107.793	868.959	133.371	163.438	406.494	0.918	294.655	-10.5529
Wood PyC with Basanite	W-P+Ba	high	4	0.07575	7.018	20.6	1150	12455.4	12898	3067.27	15362.9	769.751	3018.44	4211.27	1114.08	53.021	228.686	114.334	20.356	160.381	0.507	23.3055	-11.5436
Wood PyC with Basanite	W-P+Ba	high	4	0.07575	7.01	20.7	1159	12546.4	13000.1	3700.87	15524.7	739.797	3037.29	4285.55	1136.87	22.226	225.004	151.492	18.634	154.415	0.51	24.8446	-11.5159
Straw PyC with Basanite	S-P+Ba	high	4	0.07575	7.191	20.4	1506	15741.6	16606.7	3670.06	18700.4	1161.03	6586.47	3995.65	1088.05	208.414	352.94	84.0583	51.978	739.426	0.736	79.2114	-11.0123
Straw PyC with Basanite	S-P+Ba	high	4	0.07575	7.16	20.3	1486	15441.9	16238.4	4091.35	18465.2	1215.78	7181	3531.68	994.999	206.249	294.786	74.9647	33.6005	895.603	0.648	73.6596	-11.0439
Wood PyC	W-P	high	4	0.07575	7.057	20.4	1103	11840	12369.5	2643.48	14543.3	345.34	3360.79	4005.44	968.023	134.74	168.206	90.166	18.1665	151.252	0.511	7.70794	-11.7253
Wood PyC	W-P	high	4	0.07575	7.054	20.5	1119	12122.1	12783.6	3457.75	15035.1	401.557	3242.32	4172.08	1045.01	36.39	130.209	126.959	17.23	136.399	0.537	10.8447	-11.577
Straw PyC	S-P	high	4	0.07575	7.227	20.7	1571	16510.1	17384	4324.48	19383	1097.02	7624.11	3871.68	1063.23	173.974	216.654	114.227	24.6205	675.626	0.778	45.6928	-10.9524
Straw PyC	S-P	high	4	0.07575	7.207	20.7	1548	16185.1	17093.9	4091.35	19157.3	1002.63	7342.48	3928.99	1081.28	152.845	219.867	109.227	20.832		0.759	43.4953	-10.9738
Basanite	Ba	high	4	0.07575	6.996	20.4	1004	10827.8	11316.6	3414.46	13619.7	728.271	2213	3908.83	1054.35	2.3865	80.401	199.162	18.567	172.176	0.41	-0.265098
Basanite	Ba	high	4	0.07575	6.985	20.6	1021	11178.5	11580.6	3062.27	13987.3	663.507	2210.31	4001.98	1082.59	7.816	80.4195	156.77	17.7645	173.327	0.419	1.7147	-12.3737
Control soil	Control	high	4	0.07575	7.029	20.5	1071	11926.7	12524.2	3435.27	14859.1	347.134	2318.99	4353.23	1176.96	7.701	45.65	127.3	17.3515	142.03	0.522
Control soil	Control	high	4	0.07575	6.947	20.4	920	10023.9	10179.7	2606.01	12519.1	295.43	2173.13	3706.98	938.334	79.656	41.213	105.028	16.892	148.485	0.305
RE-biochar Wood with 10% Basanite	10BaW-P	low	6	0.1512	7.772	21.1	1077	11138.6	11593.5	2494.44	11880.6	1568.03	3376.95	2537.67	798.911		93.7175	142.687	6.27833	135.308	1.021	-1.18539
RE-biochar Wood with 10% Basanite	10BaW-P	low	6	0.1512	7.791	21.3	1106	11702.9	12285.9	2122.27	12556.8	1337.27	3391.9	2737.26	870.304	64.9603	107.835	82.6933	8.229	156.699	1.092	13.419	-11.6291
RE-biochar Wood with 50% Basanite	50BaW-P	low	6	0.1512	7.706	21.1	919	9879.7	10211.9	2303.78	10529.3	687.025	2010.58	2796.74	937.955		51.351	207.338	6.16267	139.111	0.954	-12.935
RE-biochar Wood with 50% Basanite	50BaW-P	low	6	0.1512	7.771	21.2	1067	11487.7	12080.4	2569.38	12352.3	670.988	2248.54	3388.21	1145.29		36.217	256.729	5.18067	153.28	1.15	3.87475	-11.7985
RE-biochar Straw with 10% Basanite	10BaS-P	low	6	0.1512	7.949	21.2	1732	17604.3	18210.6	3333.69	18392.8	4609.47	7976.93	2057.16	858.423		210.284	381.293	37.3123	970.07	1.238	127.473	-10.6157
RE-biochar Straw with 10% Basanite	10BaS-P	low	6	0.1512	7.951	21.4	1825	19009.8	19236.6	3865.72	19423.4	4750.7	8767.43	2094.84	810.217		135.244	314.952	18.8597	630.211	1.267	147.407	-10.5526
Wood PyC with Basanite	W-P+Ba	low	6	0.1512	7.801	21.2	1201	12918.1	13133.9	2993.16	13383.9	734.348	3155.13	3473.4	1194.55	122.902	99.136	159.493	5.00133	162.675	1.214	22.3289	-11.2612
Wood PyC with Basanite	W-P+Ba	low	6	0.1512	7.805	21.4	1200	12850.2	13843.3	2824.15	14101.4	736.139	3166.63	3501.72	1214.78		85.211	289.013	5.21667	156.272	1.242	33.0014	-11.0915
Straw PyC with Basanite	S-P+Ba	low	6	0.1512	7.859	21.5	1495	15776	16311.2	3356.17	16537.9	1032.89	6032.39	3346.7	1206.8		105.167	243.851	5.963	416.699	1.326	70.1295	-10.7642
Straw PyC with Basanite	S-P+Ba	low	6	0.1512	7.86	21.2	1541	16271.9	16889.7	3506.04	17127	1034.71	6442.07	3354.33	1223.71		101.569	188.865	5.23467	493.315	1.335	78.8327	-10.7134
Wood PyC	W-P	low	6	0.1512	7.7	21.4	983	10490.1	10762.2	2268.81	11095.7	333.01	2509.05	2995.78	924.576	74.4077	95.1645	60.9267	4.3155	167.672	0.998	-6.7095
Wood PyC	W-P	low	6	0.1512	7.774	21.4	1069	11507.3	11708.9	1699.32	11973.2	347.599	3013.44	3210.48	954.109	43.6465	71.266	42.819	9.16933	173.538	1.125	0.447552	-12.6604
Straw PyC	S-P	low	6	0.1512	7.828	21.4	1432	15007.1	15232.4	3254.6	15490	773.099	5681.69	3318.96	1196.07		104.458	233.892	6.826	484.011	1.27	27.0852	-10.8785
Straw PyC	S-P	low	6	0.1512	7.836	21.4	1385	14318.7	14784.3	2665.96	15047	732.692	6438.99	2745.31	949.821		110.399	129.785	14.373	671.352	1.194	23.6976	-10.9365
Basanite	Ba	low	6	0.1512	7.793	21.4	1121	12720.4	12582.8	2653.47	12828.6	755.527	2191.05	3545.52	1315.77		53.268	236.902	2.95267	164.152	1.203	6.98369	-11.4628
Basanite	Ba	low	6	0.1512	7.55	21.4	1048	11344.2	11042.4	2669.29	11589.7	686.193	2154.45	3293.17	1169.25		55.13	254.051	3.661	153.432	0.894	-4.54528
Control soil	Control	low	6	0.1512	7.766	21.2	1086	11578.5	11815.2	2695.93	12080.1	293.589	2145.97	3582.49	1292.99		24.2195	287.135	3.26567	128.482	1.158
Control soil	Control	low	6	0.1512	7.711	21.5	1044	11252.6	11484.2	2919.06	11813.5	325.511	2211.88	3393.03	1167.87		46.5085	219.634	4.50033	135.579	1.079
RE-biochar Wood with 10% Basanite	10BaW-P	high	6	0.1512	7.128	21.8	1186	12903.7	13160.5	1354.63	15095.7	1425.51	3693.84	3027.71	875.45		56.2497		36.1547	194.304	0.512	0.592696	-12.984
RE-biochar Wood with 10% Basanite	10BaW-P	high	6	0.1512	7.154	21.7	1237	13277.6	13612.8	1405.41	15490	1363.86	3774.4	3155.45	937.74	36.215	68.5455	40.5297	25.6993	198.974	0.564	10.1328	-11.7511
RE-biochar Wood with 50% Basanite	50BaW-P	high	6	0.1512	7.132	21.6	1240	13596.3	13852.7	2571.87	15837.1	799.058	2351.21	4000.73	1380.89		37.4955	325.044	5.03967	174.822	0.639	6.48011	-11.5752
RE-biochar Wood with 50% Basanite	50BaW-P	high	6	0.1512	7.098	21.4	1204	13179.2	13241.7	2644.31	15312.3	688.292	2379.48	3912.39	1318		34.3685	294.094	6.4175	167.281	0.579	0.983307	-12.3941
RE-biochar Straw with 10% Basanite	10BaS-P	high	6	0.1512	7.346	21.7	2000	21532.9	21498.2	3332.86	23303.7	5429.87	7330.57	3232.69	1184.73	214.971	233.163	193.473	47.987	607.854	0.898	162.541	-10.5102
RE-biochar Straw with 10% Basanite	10BaS-P	high	6	0.1512	7.293	21.8	1946	20924	20922	3675.06	22928.1	5614.4	6748.64	3267.06	1172.62	60.052	291.998	179.96	70.728	433.172	0.843	151.346	-10.5412
Wood PyC with Basanite	W-P+Ba	high	6	0.1512	7.117	21.7	1300	14265.1	14512.4	2587.69	16663.5	780.882	2999.99	3938.76	1362.68	78.5305	101.424	161.847	6.244	190.999	0.635	20.7613	-11.2928
Wood PyC with Basanite	W-P+Ba	high	6	0.1512	7.12	21.6	1295	14116	14386.7	2750.05	16542.2	575.021	2432.39	3189.09	1088.62		87.563	202.566		187.321	0.558	18.8702	-11.3343
Straw PyC with Basanite	S-P+Ba	high	6	0.1512	7.186	21.8	1589	16896.3	17168.8	2983.17	19443.4	352.327	1920.18	1377.46	463.777	52.6125	31.7175	39.307	1.024	527.36	0.359	60.7252	-10.8267
Straw PyC with Basanite	S-P+Ba	high	6	0.1512	7.199	21.7	1608	16910.2	17097.2	3142.2	19298.4	380.459	2344.9	1293.04	452.595	102.693	40.7535	38.369	2.302	820.038	0.341	59.648	-10.8345
Wood PyC	W-P	high	6	0.1512	7.079	21.8	1212	13032	13173	2383.71	15326.1	315.221	3160.9	3622.98	1171.24	194.696	78.6505	124.505	2.71767	166.863	0.535	0.306936	-12.8242
Wood PyC	W-P	high	6	0.1512	7.096	21.5	1281	14039.6	14838.7	2824.15	17160	341.047	3207.03	3972.65	1321.89	49.4645	62.402	183.701	3.95633	154.295	0.624	12.8996	-11.2006
Straw PyC	S-P	high	6	0.1512	7.263	21.7	1749	18415.9	19753.4	3571.82	21792.5	863.426	7409.56	3699.51	1364.21	229.527	86.37	238.936	6.94067	616.542	0.851	50.0548	-10.6118
Straw PyC	S-P	high	6	0.1512	7.224	21.6	1624	17042.1	18415	3344.52	20524	771.423	6866.68	3522.55	1271.16	135.343	78.331	152.1	6.15867	528.265	0.771	39.9365	-10.7099
Basanite	Ba	high	6	0.1512	7.085	21.6	1210	13090.8	13781.5	2548.56	15997.1	753.983	2284.71	3834.68	1370.39		50.1003	364.856	5.44567	187.759	0.575	4.85812	-11.6204
Basanite	Ba	high	6	0.1512	7.101	21.8	1218	13471.4	14160.3	2578.53	16341.3	701.523	2233.73	3911.74	1393.59	20.9215	54.7045	228.391	4.104	187.176	0.611	7.69321	-11.4208
Control soil	Control	high	6	0.1512	7.083	21.8	1217	13324.3	14177.2	2707.59	16452.8	292.188	2258.6	4054.59	1430.93	34.9245	23.78	186.378	2.097	156.365	0.608
Control soil	Control	high	6	0.1512	7.036	22	1042	11322.2	12087.6	2290.46	14285.4	269.018	2121.14	3336.63	1147.39	88.107	28.065	159.104	3.641	167.155	0.436
RE-biochar Wood with 10% Basanite	10BaW-P	low	9	0.2525	7.676	23.1	1248	13241.5	13972.7	2150.58	14405.8	1019.93	3775.77	3500.82	1208.4		86.7347	352.571	6.44667	160.427	1.141	30.1728	-11.1011
RE-biochar Wood with 10% Basanite	10BaW-P	low	9	0.22725	7.685	23.3	1180	13011	13585.7	1828.37	13992.7	962.072	3483.61	3457.21	1131.12		60.6927	181.821	5.0205	183.2	1.14	-10.8176
RE-biochar Wood with 50% Basanite	50BaW-P	low	9	0.22725	7.646	23.3	1084	12165.7	12804.6	2095.63	13235.6	500.001	2080.4	3806.2	1360.95		35.9937	243.171	3.597	156.747	1.12	-11.655
RE-biochar Wood with 50% Basanite	50BaW-P	low	9	0.22725	7.08	23.3	1238	14154.1	12710.2	2333.75	14703.9	502.018	2339.25	4409.94	1635.91		39.3153	307.104	3.32	164.128	0.614	-12.5059
RE-biochar Straw with 10% Basanite	10BaS-P	low	9	0.22725	7.807	23.5	1763	18974	19594.4	2358.73	19943.3	3002.82	7826.91	3030.35	1309.76		95.5633	485.46	14.992	1438.9	1.314	107.011	-10.5156
RE-biochar Straw with 10% Basanite	10BaS-P	low	9	0.22725	7.83	23.4	1828	19637.8	20450.2	2794.18	20769.3	2739.74	8642.02	3116.09	1303.66		56.966	491.123	10.4677	1024.28	1.359	123.672	-10.4528
Wood PyC with Basanite	W-P+Ba	low	9	0.22725	7.698	23.4	1351	15126.5	15642.1	2568.54	16053.8	635.697	3377.53	4277.47	1633.56		75.9597	355.63		206.072	1.28	23.2829	-11.0669
Wood PyC with Basanite	W-P+Ba	low	9	0.22725	7.722	23.4	1348	15122.9	15844.9	2439.49	16220	625.249	3354.94	4239.79	1664.84		66.2767	357.415		190.598	1.304	26.34	-11.0134
Straw PyC with Basanite	S-P+Ba	low	9	0.22725	7.739	23.2	1544	17138.8	17996.4	2845.8	18410.2	722.725	5936.85	3877.22	1507.16		57.188	275.244		418.563	1.323	58.7722	-10.6648
Straw PyC with Basanite	S-P+Ba	low	9	0.22725	7.525	23.3	1605	17825.3	18828.4	2671.78	19754.8	706.864	6220.88	4085.86	1612.87		59.2523	284.502		485.921	1.152	71.314	-10.5808
Wood PyC	W-P	low	9	0.22725	7.605	23.3	1091	12266.4	12908.9	2140.59	13415.8	235.569	2547.15	3680.42	1234.96		64.2583	90.3637		172.006	1.072	-9.00402
Wood PyC	W-P	low	9	0.22725	7.669	23.3	1128	12750.9	13397.7	1413.74	13817.2	220.649	3011.66	3718.9	1170.41		40.2007	66.5883		215.828	1.151	-5.30136
Straw PyC	S-P	low	9	0.22725	7.785	23.3	1462	16202.8	17042.6	2680.94	17350.8	465.989	5579.58	3908.29	1463.5		48.6157	323.423	4.944	492.662	1.354	22.3088	-10.7867
Straw PyC	S-P	low	9	0.22725	7.757	23.3	1410	15538.5	14357.9	2175.56	14673.8	458.854	6159.06	3452.13	1239.85		45.07	193.318	4.435	743.098	1.221	1.97215	-11.8402
Basanite	Ba	low	9	0.22725	7.73	23.3	1232	14371.3	15056.7	2589.36	15408.4	663.593	2318.18	3827.84	1890.15		59.2887	131.628		886.211	1.254	7.19291	-11.2739
Basanite	Ba	low	9	0.22725	7.729	23.4	1242	14529.2	14869	2630.15	15208.6	665.895	2282.86	4174.36	1762.95		54.5517	178.898		182.166	1.284	5.7853	-11.3684
Control soil	Control	low	9	0.22725	7.703	23.3	1162	13658.8	13898	2545.23	14262	188.814	2232.83	3961.61	1775.29		29.7787	112.81		159.474	1.216
Control soil	Control	low	9	0.22725	7.693	23.2	1205	14098.9	14297.1	2760.04	14687.3	186.515	2314.18	4086.37	1711.8		25.3003	232.266		151.134	1.227
RE-biochar Wood with 10% Basanite	10BaW-P	high	9	0.22725	7.027	23	1212	13734.3	13789.6	1124	16294.4	983.813	3700.84	3577.76	1079.21		48.8343		5.671	242.624	0.51	-49.8187
RE-biochar Wood with 10% Basanite	10BaW-P	high	9	0.22725	7.034	23.1	1233	14118	14094.5	1141.48	16603.1	838.045	3787.68	3694.1	1120.69		28.2507		6.19333	254.154	0.538	-43.3749
RE-biochar Wood with 50% Basanite	50BaW-P	high	9	0.22725	7.109	23.1	1456	17156.8	17422.5	2302.11	19931	457.311	2486.32	5285.49	1959.45		36.621	286.315		178.912	0.819	11.499	-11.15
RE-biochar Wood with 50% Basanite	50BaW-P	high	9	0.22725	7.101	23.1	1451	16899.9	16945.7	2386.21	19437.6	424.105	2486.13	5209.79	1922.28		28.816	280.221		189.688	0.796	7.20103	-11.3533
RE-biochar Straw with 10% Basanite	10BaS-P	high	9	0.22725	7.204	23	1963	21987.9	21975.4	2481.12	24505	3557.85	7645.39	4206.03	1612.55		90.631	356.413	8.80233	655.39	0.888	113.469	-10.4902
RE-biochar Straw with 10% Basanite	10BaS-P	high	9	0.22725	7.214	23.3	1945	21944.1	22311.3	2746.72	24805.9	4017.18	7098.28	4180.05	1606.95		97.2833	287.541	10.4027	511.346	0.905	120.008	-10.4659
Wood PyC with Basanite	W-P+Ba	high	9	0.22725	7.101	23.1	1462	16868.8	17152	2287.96	19685.1	660.282	3159.67	4898.04	1812.42		61.0373	214.127		224.611	0.776	15.1519	-11.2535
Wood PyC with Basanite	W-P+Ba	high	9	0.2525	7.105	23	1434	17197.5	17671	2401.19	20249	625.339	3269.17	5115.05	1879.16		67.9623	335.352	4.444	207.375	0.804	52.5729	-10.7132
Straw PyC with Basanite	S-P+Ba	high	9	0.22725	7.132	23.1	1659	18647.6	18703.4	2362.06	21280.2	807.09	6222.07	4341.31	1612.9		71.7997	229.162		550.283	0.785	38.5381	-10.8481
Straw PyC with Basanite	S-P+Ba	high	9	0.22725	7.167	23	1729	19400.4	19862.1	2759.21	22376.4	763.728	6729.14	4314.71	1656.75		66.152	165.021		838.087	0.836	56.0046	-10.6858
Wood PyC	W-P	high	9	0.22725	7.075	23.3	1363	15409.4	15669.2	2083.98	18146.6	210.992	3228.84	4601.09	1557.5		49.3747	166.659		197.211	0.701	-3.6182
Wood PyC	W-P	high	9	0.22725	7.099	22.9	1468	16708.3	16834.7	2388.7	19338.2	168.112	3353.16	5045.85	1782.86		39.699	310.326		184.996	0.777	5.21046	-11.4183
Straw PyC	S-P	high	9	0.22725	7.165	23.2	1716	19365.4	19358.6	2748.38	21812.9	429.198	7241.46	4354.95	1641.78		39.848	323.787	5.54233	554.921	0.83	24.329	-10.749
Straw PyC	S-P	high	9	0.22725	7.166	23.5	1738	19318.3	19452	2591.02	21894.8	432.303	6819.62	4519.26	1695.95		45.5077	229.782		506.821	0.852	25.0365	-10.7366
Basanite	Ba	high	9	0.22725	7.129	23.2	1499	18086	18219.7	2560.22	20707.5	650.654	2455.44	5358.47	2075.78		47.3183	201.461		211.343	0.859	15.5448	-10.9392
Basanite	Ba	high	9	0.22725	7.154	23.1	1583	19020.4	19062.5	2873.27	21505.5	691.013	2468.93	5534.74	2171.42		56.7557	111.557		204.916	0.91	21.8652	-10.791
Control soil	Control	high	9	0.22725	7.125	23	1502	18021.3	18052.6	2596.85	20549.3	144.115	2397.7	5464.8	2043.61		24.968	136.833		177.965	0.859
Control soil	Control	high	9	0.22725	7.023	23	1212	14002.4	14241.1	2139.76	16813.7	156.031	2165.34	4415.21	1579.95		29.5427	176.721		172.719	0.598
RE-biochar Wood with 10% Basanite	10BaW-P	low	12	0.22725	7.708	23.7	1257	13674.9	14046.8	1800.06	14340.9	942.619	6047.18	6019.18	2297.44		30.3835	421.365	0	180.506	1.369	51.6297	-10.8678
RE-biochar Wood with 10% Basanite	10BaW-P	low	12	0.22725	7.689	23.7	1170	12978.3	13256.2	1436.22	13579.8	1057.12	5344.58	5478.49	1912.23		30.9175	225.003	2.7	218.264	1.3	34.9209	-11.0377
RE-biochar Wood with 50% Basanite	50BaW-P	low	12	0.22725	7.645	23.6	1067	12127.4	12173.2	1636.87	12521.1	570.292	3118.28	6012.59	2226.75		38.0287	161.141	4.2	170.57	1.262	5.13216	-11.5004
RE-biochar Wood with 50% Basanite	50BaW-P	low	12	0.22725	7.678	23.7	1153	13244.6	13487.3	1949.1	13800.5	557.071	3587.1	6475.82	2771.02		10.32	158.123		183.101	1.353	16.9778	-10.9808
RE-biochar Straw with 10% Basanite	10BaS-P	low	12	0.22725	7.765	23.4	1566	16818.7	17115.6	1752.6	17385.5	2413.39	11389.2	5671.12	2290.7		14.596	401.552		1156.29	1.455	107.301	-10.5145
RE-biochar Straw with 10% Basanite	10BaS-P	low	12	0.22725	7.795	24	1622	17497.2	17533.8	2128.1	17738.5	2038.19	12807.1	5771.23	2498.67	11.1725	14.33	335.85	0.8	787.35	1.503	115.443	-10.4827
Wood PyC with Basanite	W-P+Ba	low	12	0.22725	7.617	23.5	1242	13776.3	14143	2308.77	14587.1	939.756	5742.02	6172.18	2972.97	34.2267	22.77	218.591		215.211	1.284	38.2756	-10.8511
Wood PyC with Basanite	W-P+Ba	low	12	0.22725	7.699	23.8	1249	13948	14351.4	2183.89	14662.4	855.438	5128.38	5856.6	2805.21		21.86	154.061		197.251	1.356	41.4171	-10.8168
Straw PyC with Basanite	S-P+Ba	low	12	0.22725	7.661	23.6	1361	14873.2	15055.7	2357.06	15468.2	878.461	9363.75	5352.55	2697.75		16.7423	124.866		329.598	1.294	52.0339	-10.7177
Straw PyC with Basanite	S-P+Ba	low	12	0.22725	7.73	23.5	1395	15376.7	15538.8	2382.88	15835.7	868.688	9418.32	5554.8	2756.9		17.155	116.61		363.734	1.383	59.3163	-10.6608
Wood PyC	W-P	low	12	0.22725	7.63	23.3	1157	13211.6	13203.5	1858.34	13604.1	267.006	4263.19	6352.91	2251.38		29.636	103.771	2.2	182.753	1.292	12.1173	-11.0517
Wood PyC	W-P	low	12	0.22725	7.67	23.4	1110	12567.4	12649.4	1149.81	12982.1	196.383	4680.65	5872.87	1904.78		28.118	60.9133		204.778	1.29	7.91996	-11.2364
Straw PyC	S-P	low	12	0.22725	7.739	23.4	1416	15853	15592.8	2275.47	15866.9	394.045	8547.59	6084.6	2499.48		26.292	169.953		369.632	1.431	30.2162	-10.6549
Straw PyC	S-P	low	12	0.22725	7.723	23.6	1372	15042.9	14572.8	1958.25	14863.8	410.448	9075.37	5796.54	2124.16		26.3337	214.084		579.491	1.378	22.4897	-10.7831
Basanite	Ba	low	12	0.1515	7.647	23.4	1106	12573.1	12371.4	2632.65	12738.4	973.202	3843.8	4976.78	2773.64		51.2743	80.6133	3.9	167.157	1.188	-25.1694
Basanite	Ba	low	12	0.202	7.63	23.7	1108	12489.4	12560.5	2287.13	12953.4	979.253	3717.92	5102.83	2804.57		49.2007	159.449		169.637	1.191	-3.29196
Control soil	Control	low	12	0.202	7.628	23.4	1053	11917.3	12060.7	2242.17	12448.4	174.166	3690.04	5021.26	2638		30.0503	120.412	2.8	156.205	1.168
Control soil	Control	low	12	0.22725	7.602	23.4	1082	12382.9	12487.1	2521.92	12926.7	122.179	3741.69	5149.21	2823.15		18.487	59.616	62.2	165.05	1.162
RE-biochar Wood with 10% Basanite	10BaW-P	high	12	0.22725	6.992	23.6	1161	13052.6	13046.8	918.35	15509.8	982.396	5689.2	5564.14	1710.1		32.5487			281.733	0.618	-79.8135
RE-biochar Wood with 10% Basanite	10BaW-P	high	12	0.22725	7.019	23.7	1230	13897.3	14074.8	883.38	16541.6	871.961	6001.4	6032.14	1884.59		19.565	12.233		285.967	0.702	-58.0875
RE-biochar Wood with 50% Basanite	50BaW-P	high	12	0.22725	7.103	23.7	1493	17751	17634.2	1949.1	20061.8	413.231	3961.38	8209.88	3120.44		23.55	121.19		204.825	0.974	7.30966	-11.3468
RE-biochar Wood with 50% Basanite	50BaW-P	high	12	0.22725	7.099	23.7	1482	17542.6	17157.2	1983.23	19539.6	437.328	3855.6	8296.92	3146.97		23.8857	150.329		209.496	0.963	3.00986	-11.7321
RE-biochar Straw with 10% Basanite	10BaS-P	high	12	0.22725	7.114	23.7	1731	18878.5	18749.1	1893.31	21316.4	2676.33	11665.3	6170.44	2452.9		63.5257	372.251		610.671	0.888	37.491	-10.9711
RE-biochar Straw with 10% Basanite	10BaS-P	high	12	0.22725	7.127	23.9	1702	18690.9	18510	2111.45	20961.6	3158.8	11101.8	6061.81	2427.21		53.855	293.962		465.925	0.893	32.8363	-11.0287
Wood PyC with Basanite	W-P+Ba	high	12	0.22725	7.061	23.6	1446	16684.1	16582.2	1836.7	19134.3	870.172	4941.26	7709.12	2869.53		56.333	226.397		231.349	0.885	-3.6344
Wood PyC with Basanite	W-P+Ba	high	12	0.22725	7.066	23.5	1450	16659.1	16533	1915.79	19051	835.755	5060.26	7716.29	2835		46.6167	306.034		216.341	0.888	-4.37605
Straw PyC with Basanite	S-P+Ba	high	12	0.22725	7.077	23.6	1544	17097.5	17085.4	1974.07	19654.6	951.898	9250.6	6407.06	2452.95		49.1703	206.175		435.105	0.839	3.95096	-11.8373
Straw PyC with Basanite	S-P+Ba	high	12	0.22725	7.105	23.5	1677	18661.6	18998.7	2472.8	21651.2	918.241	9940.28	6749.04	2703.71		46.7417	127.261	2.4	664.086	0.92	32.7925	-10.9182
Wood PyC	W-P	high	12	0.22725	7.048	23.5	1412	16285.2	16470.4	2068.99	19094.6	187.473	5056.03	7803.29	2701.61		26.869	149.388		214.664	0.875	-2.67322
Wood PyC	W-P	high	12	0.22725	7.086	23.5	1518	17669.5	16898.1	2166.4	19326.8	121.045	5342.75	8385.96	3038.13		27.378	234.056		191.919	0.945	0.56661	-12.3818
Straw PyC	S-P	high	12	0.22725	7.115	23.6	1636	18143.7	18828.4	2104.79	21389.4	305.47	10636.5	6800.52	2661.29		22.134	310.368	0.8	450.602	0.931	15.1886	-10.9536
Straw PyC	S-P	high	12	0.22725	7.115	23.6	1645	18430.4	19079	2152.25	21664.5	314.379	9997.65	7071.33	2757.96		23.273	243.043	1	388.376	0.95	17.0869	-10.9025
Basanite	Ba	high	12	0.202	7.104	23.5	1526	18177.4	18912.7	2523.58	21516.7	914.43	4056.64	8037.49	3302.75		41.395	96.4507		203.193	0.987	-0.0900743
Basanite	Ba	high	12	0.202	7.093	23.5	1497	17724	18561.8	2940.71	21197.9	1048.18	4092.73	7718.59	3258.5		52.5625	108.04		197.258	0.955	-2.42917
Control soil	Control	high	12	0.22725	7.069	23.5	1421	16875.6	17249.2	2325.43	19865	91.351	3722.24	7592.16	2888.76		20.5285	98.3957		181.8	0.904
Control soil	Control	high	12	0.22725	7.038	23.7	1346	15758.9	16397.4	1998.22	19072.7	121.21	3601.41	7665.88	2734.23		17.628	172.686	0	190.752	0.863
RE-biochar Wood with 10% Basanite	10BaW-P	low	15	0.22725	7.704	22.3	1165	13292.9	13580.1	1553.61	13885.1	738.761	5703.93	6159.61	2381.15		31.4053	297.669		169.648	1.343	148.263	-10.4097
RE-biochar Wood with 10% Basanite	10BaW-P	low	15	0.22725	7.663	22.5	1047	11695	11845.8	1103.18	12184.8	751.118	4914.63	5520.67	1850.16		25.469	181.649		205.234	1.223	111.61	-10.533
RE-biochar Wood with 50% Basanite	50BaW-P	low	15	0.22725	7.591	22.4	877	10011.9	10206.1	1134.82	10601	436.235	2822.72	5149.58	1773.99		28.4017	138.963		165.416	1.077	32.8235	-10.6945
RE-biochar Wood with 50% Basanite	50BaW-P	low	15	0.22725	7.607	22.4	954	10598	10751.6	1519.48	11139.4	400.756	3343.8	5227.58	2095.88		24.691	328.731		160.819	1.112	37.7408	-10.6339
RE-biochar Straw with 10% Basanite	10BaS-P	low	15	0.22725	7.742	22.8	1275	14028.7	14302.3	1268.04	14592.7	1236.9	9493	4925.48	1916.29		33.1123	249.276		900.208	1.318	150.632	-10.3671
RE-biochar Straw with 10% Basanite	10BaS-P	low	15	0.22725	7.711	22.4	1270	13437	13557.1	1596.91	13895.1	903.738	10367.8	4430.61	1933.08		28.2293	410.912		795.051	1.221	136.124	-10.4111
Wood PyC with Basanite	W-P+Ba	low	15	0.22725	7.634	22.3	1058	11530.9	11740.1	1533.63	12126.2	766.25	4608.24	5089.92	2107.13		39.194	466.374		170.002	1.156	78.0137	-10.5418
Wood PyC with Basanite	W-P+Ba	low	15	0.202	7.614	22.1	1037	11550.5	11885.2	1650.2	12311.5	758.889	4740.1	4991	2107.16		43.6427	198.646		158.072	1.132	60.2942	-10.6537
Straw PyC with Basanite	S-P+Ba	low	15	0.22725	7.648	22.1	1138	12610	12452.1	1673.51	12849.1	677.757	7854.05	4885.55	1919.42		43.303	153.191		256.982	1.169	88.7465	-10.4858
Straw PyC with Basanite	S-P+Ba	low	15	0.202	7.522	22.4	1146	12864.1	13004.5	1764.26	13648.1	720.698	7626	4503.36	1892.95		61.6835	188.989		262.711	1.037	75.2921	-10.5572
Wood PyC	W-P	low	15	0.22725	7.575	22.5	990	11447.3	11668.3	1661.85	12129	161.543	3906.92	5889.36	1994.09		21.863	54.1037		153.568	1.158	38.659	-10.5479
Wood PyC	W-P	low	15	0.22725	7.622	22	1003	11545.5	11752.4	978.294	12149.2	134.739	4406.78	5887.72	1868.08		20.27	34.8003		194.08	1.2	39.296	-10.5408
Straw PyC	S-P	low	15	0.22725	7.617	22.1	1123	12515.2	12678.2	1787.57	13128.2	207.352	7387.59	5093.74	1958.45		19.3805	87.3493		256.952	1.163	46.309	-10.4695
Straw PyC	S-P	low	15	0.22725	7.676	22.1	1164	12751.2	13028.4	1598.57	13394.8	207.238	7982.63	5117.59	1931.72		24.819	196.014		391.424	1.231	48.9617	-10.4453
Basanite	Ba	low	15
Basanite	Ba	low	15	0.12625	7.642	22.5	973	11013.3	11361.2	1746.78	11718.2	903.33	3541.36	5104.59	2296.01		52.105	144.722		151.744	1.156	-1.89752
Control soil	Control	low	15	0.101	7.614	22	933	10483.1	10778.3	1729.29	11166.9	131.123	3354.16	4887.95	2178.87		41.2635	118.782		140.22	1.09
Control soil	Control	low	15	0.17675	7.617	22.2	936	10462.6	10721.9	1749.27	11099.8	84.7585	3413.44	4929.93	2288.71		24.8495	200.758		135.235	1.095
RE-biochar Wood with 10% Basanite	10BaW-P	high	15	0.22725	7.006	22.2	1080	12347.9	12730.7	714.28	15104.6	722.011	5185.67	5628.78	1747.7		25.714			263.548	0.61	25.2466	-11.1785
RE-biochar Wood with 10% Basanite	10BaW-P	high	15	0.22725	7.021	22.1	1109	12681.8	13057.8	645.175	15400.4	647.175	5361.8	5908.04	1820.18		25.0445			292.227	0.649	32.1596	-11.0734
RE-biochar Wood with 50% Basanite	50BaW-P	high	15	0.1515	6.991	22.1	1091	12550	12737.8	1422.9	15184	305.202	3485.13	6008.41	2231.92		32.4825	217.464		187.672	0.617	-27.4416
RE-biochar Wood with 50% Basanite	50BaW-P	high	15	0.1515	7.044	22.7	1097	12588.5	13184	1313.83	15384.1	376.418	3477.15	6264.37	2309.09		24.983	220.572		199.252	0.704	-24.7602
RE-biochar Straw with 10% Basanite	10BaS-P	high	15	0.22725	7.128	22.7	1408	15636.9	15932.5	1415.4	18112.5	1221.16	9930.52	5409.22	2094.35		31.2365	226.351		513.396	0.79	85.5877	-10.6127
RE-biochar Straw with 10% Basanite	10BaS-P	high	15	0.22725	7.116	22.4	1396	15443.5	15629.9	1538.63	17843.5	1546.74	9986.95	5351.24	2072.5		34.3735	204.919		445.85	0.762	79.6968	-10.6436
Wood PyC with Basanite	W-P+Ba	high	15	0.22725	7.075	22.5	1223	14238.4	14417	1473.69	16628.7	813.104	4444.42	6958.56	2503.55		38.92	140.105		208.648	0.8	43.4272	-10.7962
Wood PyC with Basanite	W-P+Ba	high	15	0.22725	7.048	22.6	1155	13006.9	13357.2	1424.56	15571.1	778.406	4434.8	6116.89	2200.83		45.0865	339.745		210.081	0.701	27.4515	-10.9954
Straw PyC with Basanite	S-P+Ba	high	15	0.22725	7.071	22.7	1204	13321.7	14014.1	1397.09	16241.8	785.879	7628.01	4947.26	1881.46		38.392	188.778		343.263	0.66	37.3537	-10.8617
Straw PyC with Basanite	S-P+Ba	high	15	0.22725	7.11	22.8	1355	14978.2	15906.9	1909.13	18176.5	765.843	8025.66	5489.5	2252.17		41.3625	170.243		480.404	0.782	65.8863	-10.6152
Wood PyC	W-P	high	15	0.22725	7.073	22.1	1185	14048.3	14085.7	1739.28	16282.1	105.89	4366.1	6781.84	2341.49		17.6473	101.649		180.043	0.778	19.3131	-10.8493
Wood PyC	W-P	high	15	0.22725	7.128	22.1	1316	15376.8	16431.5	3432.77	18643	73.7015	4799.69	7526.22	2628.42		32.578	79.5383		175.945	0.924	37.0825	-10.566
Straw PyC	S-P	high	15	0.22725	7.076	21.9	1308	14556.6	14841.6	1664.35	17171	135.362	8525.62	5699.72	2194.78		17.11	218.792		368.61	0.726	25.039	-10.7365
Straw PyC	S-P	high	15	0.22725	7.098	22	1313	14771	15303.2	1599.41	17574.8	152.841	8180.55	5787.48	2206.83		19.2415	141.437		315.93	0.766	28.5357	-10.6797
Basanite	Ba	high	15
Basanite	Ba	high	15
Control soil	Control	high	15	0.1515	7.033	22	1108	12976.5	13418.9	1536.13	15751.1	47.9005	3270.56	6095.35	2266.17		17.757	192.405		164.654	0.683
Control soil	Control	high	15	0.22725	7.07	22.1	1148	13501	14126.3	1511.99	16365.1	60.069	3152.16	6271.38	2204.17		19.0767	168.002		171.059	0.751
RE-biochar Wood with 10% Basanite	10BaW-P	low	21	0.4545	7.631	24.8	968	10640.2	10336.5	1148.14	10704.3	294.463	2497.46	3162.68	1171.13		18.723	254.538		149.383	0.978	153.203	-10.0944
RE-biochar Wood with 10% Basanite	10BaW-P	low	21	0.4545	7.581	24.4	882	9703.8	9425.7	819.519	9831.76	304.866	2232.61	2988	965.34		18.1477	155.236		179.547	0.873	133.954	-10.1528
RE-biochar Wood with 50% Basanite	50BaW-P	low	21	0.303	7.53	24.7	750	8206.8	7966.1	920.013	8370.58	215.073	1405.47	2732.22	875.206		30.902	130.249		136.15	0.735	20.0413	-10.6077
RE-biochar Wood with 50% Basanite	50BaW-P	low	21	0.22725	7.543	24.8	791	8497.1	8257	1122.33	8658	206.22	1601.68	2730.44	987.987		30.4677	318.531		139.488	0.759	9.38434	-10.9372
RE-biochar Straw with 10% Basanite	10BaS-P	low	21	0.4545	7.605	24	996	10747.8	10428.3	890.872	10857.2	324.735	3992.49	2574.32	908.814		25.6595	137.131		590.572	0.865	142.91	-10.089
RE-biochar Straw with 10% Basanite	10BaS-P	low	21	0.42925	7.611	24.6	989	10082.9	9796.3	1184.78	10191.6	225.976	4357.13	2285.05	967.995		25.336	437.568		415.063	0.806	120.011	-10.1648
Wood PyC with Basanite	W-P+Ba	low	21	0.404	7.564	24.6	855	8984.1	8591	1108.18	8984.9	393.35	2178.13	2658.97	997.307		33.359	420.889		153.989	0.778	68.5728	-10.2968
Wood PyC with Basanite	W-P+Ba	low	21	0.2525	7.54	24.4	894	9724.1	9370.3	1381.27	9831.68	457.695	2297.59	2715.96	1067.83		47.5953	134.397		143.26	0.792	31.9314	-10.6287
Straw PyC with Basanite	S-P+Ba	low	21	0.37875	7.57	24.4	902	9492.9	9161.5	1269.7	9584.16	351.758	3428.4	2311.38	841.472		35.3203	185.133		208.684	0.749	68.5447	-10.297
Straw PyC with Basanite	S-P+Ba	low	21	0.37875	7.558	24.5	920	9616.9	9288.8	1253.88	9730.24	357.458	3580.91	2340.21	910.862		35.8547	267.165		225.094	0.747	70.1438	-10.287
Wood PyC	W-P	low	21	0.4545	7.467	24.2	770	8520.1	8223.1	1063.22	8727.49	28.023	1752.94	2705.26	863.312		16.5027	70.623		133.399	0.674	38.9026	-10.2441
Wood PyC	W-P	low	21	0.4545	7.591	24.1	884	9975.5	9710.3	793.792	10113.9	28.157	2001.77	3212.88	987.191		19.4597	44.5357		148.866	0.92	50.1681	-10.1337
Straw PyC	S-P	low	21	0.404	7.506	24.4	849	8928.7	8633.6	1221.41	9113.99	47.367	3253.94	2288.99	805.588		18.7455	173.4		201.074	0.663	34.7455	-10.2932
Straw PyC	S-P	low	21	0.4545	7.584	24.3	939	10045.6	9655.7	1156.47	10075.1	39.7867	3446.74	2656.07	961.536		15.7887	198.708		285.877	0.835	49.7545	-10.1373
Basanite	Ba	low	21	0.202	7.564	24.2	880	9757.1	9363.2	1695.16	9792.08	605.313	1866.88	2729.83	1197.4		68.8453	119.064		141.485	0.813	-7.54974
Basanite	Ba	low	21	0.202	7.55	24.2	827	9023	8683.5	1372.11	9101.08	528.092	1717.59	2665.57	1086.72		53.7677	192.815		138.377	0.764	5.78859	-11.0672
Control soil	Control	low	21	0.101	7.531	24.2	790	8796.7	8644.9	1585.25	9084.89	45.058	1723.22	2694.66	1075.5		37.9653	77.079		126.307	0.751
Control soil	Control	low	21	0.22725	7.515	24.2	788	8657	8507.6	1362.95	8961.44	19.5005	1631.92	2714.37	1024.14		30.552	149.143		122.389	0.733
RE-biochar Wood with 10% Basanite	10BaW-P	high	21	0.4545	6.942	24.5	986	11194.8	11057.2	554.506	13480.9	327.736	2457.31	3419.22	1029.66		18.4167			232.446	0.354	120.17	-10.1999
RE-biochar Wood with 10% Basanite	10BaW-P	high	21	0.4545	6.942	24.4	988	11163.7	11266.3	468.915	13737.9	291.891	2441.82	3467.37	1007.42		16.1305			256.254	0.365	124.589	-10.1842
RE-biochar Wood with 50% Basanite	50BaW-P	high	21	0.22725	6.9	24.7	898	9658.5	9776.6	1051.56	12149.6	185.6	1798.4	3066.7	1127.67		33.981	298.407		175.557	0.228	-4.35278
RE-biochar Wood with 50% Basanite	50BaW-P	high	21	0.22725	6.93	24.8	954	10575.2	10528.7	1039.91	12891.3	229.045	1785.09	3348.61	1259.86		33.2567	216.819		177.233	0.318	-0.962972
RE-biochar Straw with 10% Basanite	10BaS-P	high	21	0.47975	6.982	24.7	1131	12258.6	12177.3	957.48	14606.8	338.879	4581.18	2907.58	1049.18		24.878	133.131		388.967	0.361	145.67	-10.0807
RE-biochar Straw with 10% Basanite	10BaS-P	high	21	0.4545	6.974	24.6	1125	12075.9	12037.2	1059.89	14492.7	421.504	4780.41	2773.55	1020.18		27.4667	163.158		324.609	0.329	129.772	-10.1309
Wood PyC with Basanite	W-P+Ba	high	21	0.42925	6.903	24.4	955	10721.2	10776.6	932.502	13373.5	418.081	2064.14	3247.57	1115.63		32.0737	123.949		185.336	0.284	72.4577	-10.2729
Wood PyC with Basanite	W-P+Ba	high	21	0.42925	6.904	24.6	960	10526.2	10553.1	1079.04	13083.5	419.81	2134.54	3203.67	1151.27		34.157	280.856		186.159	0.273	69.2758	-10.2924
Straw PyC with Basanite	S-P+Ba	high	21	0.4545	6.905	24.3	977	10470.7	10532.1	938.33	13085.8	428.563	3514.25	2637.68	929.394		32.6763	180.926		286.783	0.193	77.797	-10.242
Straw PyC with Basanite	S-P+Ba	high	21	0.4545	6.924	24.3	1049	11318.7	11410.3	1179.78	14053.6	412.631	3377.55	2583.37	1033.99		30.7153			391.27	0.232	91.0352	-10.1737
Wood PyC	W-P	high	21	0.4545	6.86	24.4	910	10116.1	10020.4	1088.2	12715.3	18.2585	1851.77	2906.19	977.775		15.8645			358.24	0.176	35.2179	-10.2873
Wood PyC	W-P	high	21	0.37875	6.89	24.4	966	10778.8	10754.2	2115.61	13446.6	22.545	2000.05	2906.43	1003.61		16.476			153.887	0.231	27.1992	-10.3995
Straw PyC	S-P	high	21	0.4545	6.9	24.2	969	10308.1	10530.3	992.448	13131.1	28.3993	3426.13	2382.96	917.214		16.18			281.935	0.149	39.0804	-10.2421
Straw PyC	S-P	high	21	0.4545	6.884	24.2	947	10135.8	10342.3	993.281	12999.1	31.6605	3325.53	2317.04	876.85		16.333			255.421	0.116	37.6563	-10.2583
Basanite	Ba	high	21	0.202	6.93	24.2	1026	11370.3	11090.6	1358.79	13608.8	562.795	1843.54	3040.89	1251.67		59.69			186.435	0.292	-21.7973
Basanite	Ba	high	21	0.202	6.93	24.3	1047	11623.9	11779.3	1598.57	14446.1	597.842	1884.54	3066.18	1272.75		61.0613			180.247	0.318	-20.6496
Control soil	Control	high	21	0.17675	6.853	24.1	912	10060.9	10283.2	1179.78	13103.4	10.324	1597.95	2891.45	1062.8		18.866			159.543	0.172
Control soil	Control	high	21	0.303	6.866	24.4	893	9892.2	10115	1280.52	12798.5	12.916	1495.34	2881.55	1013.11		17.979			154.869	0.183
RE-biochar Wood with 10% Basanite	10BaW-P	low	27	0.4545	7.556	19.5	770	8792.9	8801.5	825.847	9267.85	225.429	1861.56	2440.57	867.571					155.386	0.683	147.734	-10.1102
RE-biochar Wood with 10% Basanite	10BaW-P	low	27	0.4545	7.528	19.5	712	7760.8	8161.7	581.482	8633.66	248.192	1649.81	2288.87	734.669					190.1	0.605	134.212	-10.1519
RE-biochar Wood with 50% Basanite	50BaW-P	low	27	0.18	7.538	19.4	698	7673.1	8041.1	777.057	8497.4	243.062	1027.39	2238.17	619.901					141.359	0.604	12.3797	-10.8169
RE-biochar Wood with 50% Basanite	50BaW-P	low	27	0.16075	7.578	19.5	797	7825.4	8122.7	1005.77	8533.19	246.177	1162.34	2246.27	685.496					146.528	0.648	9.56979	-10.9287
RE-biochar Straw with 10% Basanite	10BaS-P	low	27	0.4545	7.586	19.4	786	8344.4	8816.8	663.159	9260.65	167.842	2290.04	1901.34	549.018					475.107	0.617	136.382	-10.1093
RE-biochar Straw with 10% Basanite	10BaS-P	low	27	0.31825	7.59	19.4	815	8278	8835	969.968	9275.35	149.782	2666.06	1791.91	636.867					371.885	0.595	85.1752	-10.3137
Wood PyC with Basanite	W-P+Ba	low	27	0.26275	7.56	19.4	741	8048.9	8324.1	937.497	8769.56	416.959	1435.73	2124.35	658.863					161.052	0.615	45.2375	-10.4775
Wood PyC with Basanite	W-P+Ba	low	27	0.182	7.592	19.3	790	8007.8	9024.4	1019.09	9465.36	504.218	1526.42	2143.92	704.669					151.094	0.677	27.171	-10.6988
Straw PyC with Basanite	S-P+Ba	low	27	0.21225	7.555	19.4	776	8238.4	8613.4	1027.42	9087.53	394.111	2276.84	1784.3	554.405					205.561	0.552	33.3319	-10.6101
Straw PyC with Basanite	S-P+Ba	low	27	0.26975	7.53	19.5	793	8120.8	8496.8	978.294	8995.85	384.056	2303.71	1778.09	581.401					229.061	0.522	48.7151	-10.4453
Wood PyC	W-P	low	27	0.4545	7.415	19.6	593	6558.2	6771.1	884.212	7309.02	23.1227	1135.34	1835.41	475.915					152.842	0.346	37.5709	-10.2593
Wood PyC	W-P	low	27	0.4545	7.562	19.5	728	8116.9	8517.4	671.401	8966.28	21.546	1225.87	2381.04	606.556					139.079	0.675	50.7991	-10.1282
Straw PyC	S-P	low	27	0.17675	7.533	19.2	722	7657	7876.5	985.788	8339.71	40.957	2183.31	1777.61	533.239					198.567	0.495	9.48263	-10.8572
Straw PyC	S-P	low	27	0.303	7.528	19.4	766	8463.3	8465.1	929.171	8963.79	19.0007	2042.08	1918.15	604.147					247.127	0.55	29.0285	-10.3713
Basanite	Ba	low	27	0.082	7.584	19.7	768	8277.4	8751.4	1260.54	9185.91	665.492	1314.83	2045.51	784.631					153.736	0.643	-1.74238
Basanite	Ba	low	27	0.1375	7.548	19.6	752	8076	8236.4	1157.3	8690.1	574.677	1220.7	2086.91	710.126					150.625	0.594	5.10331	-11.1219
Control soil	Control	low	27	0.088	7.545	19.6	719	7810.2	7761.3	1189.77	8192.01	29.3277	1275.01	2143.17	725.919					139.992	0.581
Control soil	Control	low	27	0.12325	7.528	19.7	693	7677.6	7816.9	1205.59	8271.78	50.695	1121.37	2108.71	666.042					131.104	0.564
RE-biochar Wood with 10% Basanite	10BaW-P	high	27	0.4545	6.912	19.4	844	9553	10026.5	443.105	12619.5	274.15	1429.56	2745.24	656.554					240.975	0.144	170.1	-10.049
RE-biochar Wood with 10% Basanite	10BaW-P	high	27	0.4545	6.916	19.4	869	9909.3	10414.3	383.991	13078	267.377	1397.36	2849.84	632.453					265.785	0.177	178.296	-10.0286
RE-biochar Wood with 50% Basanite	50BaW-P	high	27	0.12625	6.878	19.9	838	9209.4	9743.1	976.629	12446.5	211.34	1303.75	2649.16	856.109					180.38	0.09	6.56644	-11.0923
RE-biochar Wood with 50% Basanite	50BaW-P	high	27	0.12625	6.888	19.8	863	9547.2	10111.5	918.348	12844.7	283.847	1335.27	2835.22	925.892					186.796	0.137	7.4889	-11.0352
RE-biochar Straw with 10% Basanite	10BaS-P	high	27	0.4545	6.895	19.9	901	9575	9847.3	692.716	12484.8	210.68	2946.64	2321.29	688.387					352.418	0.055	153.198	-10.0588
RE-biochar Straw with 10% Basanite	10BaS-P	high	27	0.4545	6.894	19.6	910	9599.6	9871.7	730.765	12538.7	244.964	3134.08	2235.15	648.372					296.36	0.036	153.673	-10.0574
Wood PyC with Basanite	W-P+Ba	high	27	0.3535	6.85	19.6	803	8736.5	8992.5	737.259	11672.7	448.977	1500.11	2662.98	747.134					188.814	0.03	75.6155	-10.2543
Wood PyC with Basanite	W-P+Ba	high	27	0.27775	6.863	19.6	837	9169.7	9270.3	867.56	11947.7	476.328	1480.89	2677.09	787.302					195.634	0.055	55.582	-10.388
Straw PyC with Basanite	S-P+Ba	high	27	0.4545	6.848	19.5	791	8418	8547.7	668.904	11137.8	426.452	2258.02	2079.18	615.614					280.5	-0.09	99.0338	-10.1372
Straw PyC with Basanite	S-P+Ba	high	27	0.42925	6.876	19.3	895	9560	9146.2	927.506	11735.6	453.731	2157.16	2284.27	758.8					322.64	-0.005	100.396	-10.1312
Wood PyC	W-P	high	27	0.45955	6.795	19.5	716	8145.8	8226.7	819.353	11036.3	5.82733	1216.93	2484.15	659.639					163.907	-0.082	48.0266	-10.1526
Wood PyC	W-P	high	27	0.202	6.839	19.4	790	8654	9057.4	1508.65	11842.6	25.192	1525.92	2550.03	759.182					164.205	0.003	15.5102	-10.6435
Straw PyC	S-P	high	27	0.404	6.841	19.4	795	8629.7	8932.5	731.514	11692.3	35.8767	2087.45	2008.65	634.304					267.755	-0.094	45.1624	-10.1793
Straw PyC	S-P	high	27	0.32325	6.83	19.4	761	8380.3	8388.6	746.168	11048.4	12.608	2246.29	2012.33	647.113					245.423	-0.128	30.2105	-10.3539
Basanite	Ba	high	27	0.11125	6.874	19.9	872	9650.7	9780.8	1050.73	12706.3									196.597
Basanite	Ba	high	27	0.05475	6.866	19.9	933	10458.8	11564.5	1412.07	14822.4	745.472	1813.88	2891.51	1215.44					197.877	0.166	-4.38618	-11.3355
Control soil	Control	high	27	0.07575	6.837	19.9	800	8763.8	9272	1049.06	12091.2	27.716	1605.41	2760.4	1050.11					168.456	0.043
Control soil	Control	high	27	0.12225	6.817	19.9	776	8613.8	8962.1	1006.6	11827.7	25.6285	1412.62	2651.88	948.072					161.226	-0.003

## Sheet: Measured C-sinks from Experimen
Amendment					Observed Flux								Planned Flux
					low CO2				high CO2				low CO2				high CO2
	IC-sink	PyC-sink	Total C-sink		IC-sink	PyC-sink	Total C-sink		IC-sink	PyC-sink	Total C-sink		IC-sink	PyC-sink	Total C-sink		IC-sink	PyC-sink	Total C-sink
	t CO2, application rate 12 t ha-1				t CO2 after 27 weeks, application rate 12 t ha-1								t CO2 after 27 weeks, application rate 12 t ha-1
10BaW-P	1.536	17.448	18.984		0.14465	14.5356	14.6803		0.104263	14.5356	14.6399		0.0369815	14.5356	14.5726		0.00547432	14.5356	14.5411
50BaW-P	3.504	1.5	5.004		0.0868057	1.24963	1.33643		0.00622365	1.24963	1.25585		-0.00695737	1.24963	1.24267		0.0287528	1.24963	1.27838
10BaS-P	1.692	15.384	17.076		0.262866	11.083	11.3459		0.234141	11.083	11.3172		0.165171	11.083	11.2482		0.127336	11.083	11.2104
W-P + Ba	2.34	18.636	20.976		0.126966	15.5253	15.6523		0.13156	15.5253	15.6569		0.0587982	15.5253	15.5841		0.0268188	15.5253	15.5522
S-P + Ba	2.292	16.116	18.408		0.2045	11.6104	11.8149		0.220544	11.6104	11.8309		0.122555	11.6104	11.7329		0.088563	11.6104	11.6989
W-P	0.3	37.092	37.392		0.314153	30.9007	31.2149		0.240037	30.9007	31.1408		0.0301874	30.9007	30.9309		0.0381215	30.9007	30.9389
S-P	0.192	32.076	32.268		0.380764	23.1083	23.4891		0.423236	23.1083	23.5316		0.186118	23.1083	23.2945		0.190997	23.1083	23.2993
Ba	4.404	0	4.404		0.0133609	0	0.0133609		-0.096221	0	-0.096221		0.0438477	0	0.0438477		0.121971	0	0.121971

## Sheet: Extrapolated C-sinks_med
Measured and extrapolated data, medium scenario
Remark	* IC-sink of year 0 and 0.5 is based on measured flux data
Configuration	RE-biochar Wood with 10% Basanite
Label	10BaW-P
low pCO2					high pCO2
Year	IC-sink	PyC-sink	Total C-sink		Year	IC-sink	PyC-sink	Total C-sink
0*	0	17.448	17.448		0*	0	17.448	17.448
0.5*	0.14465	14.5356	14.6803		0.5*	0.104263	14.5356	14.6399
1	0.0203661	14.4091	14.5741		1	0.0324491	14.4091	14.5458
2	0.035003	14.2197	14.4197		2	0.0557697	14.2197	14.4122
3	0.0269715	14.0957	14.3227		3	0.0429733	14.0957	14.3312
4	0.0207829	14.0106	14.2583		4	0.033113	14.0106	14.2791
5	0.0160142	13.9486	14.2124		5	0.0255152	13.9486	14.2427
6	0.0123397	13.9004	14.1766		6	0.0196607	13.9004	14.2142
7	0.00950837	13.8606	14.1462		7	0.0151495	13.8606	14.1895
8	0.00732666	13.8258	14.1187		8	0.0116735	13.8258	14.1663
9	0.00564555	13.7941	14.0927		9	0.00899498	13.7941	14.1436
10	0.00435017	13.7643	14.0673		10	0.00693107	13.7643	14.1208
11	0.00335202	13.7358	14.0421		11	0.00534073	13.7358	14.0976
12	0.0025829	13.7081	14.017		12	0.00411529	13.7081	14.0741
13	0.00199025	13.6811	13.992		13	0.00317103	13.6811	14.0502
14	0.00153358	13.6545	13.967		14	0.00244344	13.6545	14.0261
15	0.0011817	13.6284	13.942		15	0.00188279	13.6284	14.0018
16	0.000910558	13.6025	13.917		16	0.00145078	13.6025	13.9774
17	0.00070163	13.5769	13.8922		17	0.0011179	13.5769	13.953
18	0.00054064	13.5517	13.8674		18	0.000861394	13.5517	13.9285
19	0.00041659	13.5267	13.8428		19	0.000663746	13.5267	13.9042
20	0.000321003	13.5019	13.8184		20	0.000511449	13.5019	13.8799
Configuration	RE-biochar Wood with 50% Basanite
Label	50BaW-P
low pCO2					high pCO2
Year	IC-sink	PyC-sink	Total C-sink		Year	IC-sink	PyC-sink	Total C-sink
0*	0	1.516	1.516		0*	0	1.516	1.516
0.5*	0.0868057	1.26296	1.34976		0.5*	0.00622365	1.26296	1.26918
1	0.0196102	1.25196	1.35838		1	0.0542662	1.25196	1.31245
2	0.0337037	1.23551	1.37563		2	0.0932665	1.23551	1.38926
3	0.0259703	1.22473	1.39082		3	0.0718664	1.22473	1.45035
4	0.0200114	1.21733	1.40343		4	0.0553766	1.21733	1.49833
5	0.0154198	1.21195	1.41347		5	0.0426703	1.21195	1.53562
6	0.0118817	1.20776	1.42117		6	0.0328796	1.20776	1.56431
7	0.00915543	1.2043	1.42686		7	0.0253353	1.2043	1.58619
8	0.0070547	1.20128	1.43089		8	0.0195221	1.20128	1.60268
9	0.00543599	1.19852	1.43357		9	0.0150427	1.19852	1.61497
10	0.0041887	1.19594	1.43517		10	0.0115912	1.19594	1.62398
11	0.0032276	1.19346	1.43592		11	0.00893156	1.19346	1.63043
12	0.00248702	1.19106	1.43601		12	0.0068822	1.19106	1.63491
13	0.00191637	1.18871	1.43558		13	0.00530307	1.18871	1.63786
14	0.00147666	1.1864	1.43474		14	0.00408628	1.1864	1.63964
15	0.00113784	1.18412	1.43361		15	0.00314868	1.18412	1.64052
16	0.000876759	1.18188	1.43224		16	0.00242621	1.18188	1.6407
17	0.000675586	1.17966	1.43069		17	0.00186951	1.17966	1.64034
18	0.000520572	1.17746	1.42902		18	0.00144055	1.17746	1.63959
19	0.000401126	1.17529	1.42724		19	0.00111002	1.17529	1.63853
20	0.000309087	1.17314	1.4254		20	0.000855321	1.17314	1.63723
Configuration	RE-biochar Straw with 10% Basanite
Label	10BaS-P
low pCO2					high pCO2
Year	IC-sink	PyC-sink	Total C-sink		Year	IC-sink	PyC-sink	Total C-sink
0*	0	15.384	15.384		0*	0	15.384	15.384
0.5*	0.262866	11.083	11.3459		0.5*	0.234141	11.083	11.3172
1	0.0321529	10.9865	11.2816		1	0.0230246	10.9865	11.2437
2	0.0552607	10.8421	11.1924		2	0.039572	10.8421	11.1389
3	0.042581	10.7476	11.1404		3	0.0304922	10.7476	11.0748
4	0.0328108	10.6827	11.1083		4	0.0234957	10.6827	11.0334
5	0.0252823	10.6354	11.0864		5	0.0181046	10.6354	11.0042
6	0.0194812	10.5987	11.0691		6	0.0139505	10.5987	10.9815
7	0.0150113	10.5683	11.0537		7	0.0107495	10.5683	10.9618
8	0.0115669	10.5418	11.0388		8	0.00828303	10.5418	10.9436
9	0.00891287	10.5176	11.0235		9	0.00638248	10.5176	10.9258
10	0.0068678	10.4949	11.0077		10	0.00491801	10.4949	10.908
11	0.00529198	10.4731	10.9912		11	0.00378957	10.4731	10.8901
12	0.00407773	10.4521	10.9742		12	0.00292005	10.4521	10.8719
13	0.00314209	10.4315	10.9568		13	0.00225004	10.4315	10.8535
14	0.00242113	10.4112	10.9389		14	0.00173377	10.4112	10.835
15	0.0018656	10.3912	10.9208		15	0.00133595	10.3912	10.8164
16	0.00143754	10.3715	10.9025		16	0.00102942	10.3715	10.7977
17	0.00110769	10.352	10.8842		17	0.000793216	10.352	10.779
18	0.000853531	10.3328	10.8657		18	0.000611211	10.3328	10.7603
19	0.000657687	10.3137	10.8473		19	0.000470968	10.3137	10.7417
20	0.00050678	10.2948	10.829		20	0.000362904	10.2948	10.7232
Configuration	Wood PyC with Basanite
Label	W-P + Ba
low pCO2					high pCO2
Year	IC-sink	PyC-sink	Total C-sink		Year	IC-sink	PyC-sink	Total C-sink
0*	0	18.636	18.636		0*	0	18.636	18.636
0.5*	0.126966	15.5253	15.6523		0.5*	0.13156	15.5253	15.6569
1	0.0354485	15.3902	15.5526		1	0.000574689	15.3902	15.5223
2	0.0609248	15.1879	15.4113		2	0.000987709	15.1879	15.321
3	0.0469455	15.0555	15.3258		3	0.000761078	15.0555	15.1893
4	0.0361738	14.9645	15.271		4	0.000586448	14.9645	15.099
5	0.0278737	14.8983	15.2326		5	0.000451887	14.8983	15.0332
6	0.021478	14.8469	15.2027		6	0.000348201	14.8469	14.9822
7	0.0165499	14.8043	15.1767		7	0.000268306	14.8043	14.9399
8	0.0127525	14.7671	15.1523		8	0.000206743	14.7671	14.9029
9	0.00982642	14.7333	15.1282		9	0.000159305	14.7333	14.8692
10	0.00757174	14.7015	15.104		10	0.000122753	14.7015	14.8375
11	0.00583439	14.671	15.0794		11	9.45869e-05	14.671	14.8072
12	0.00449569	14.6415	15.0543		12	7.28838e-05	14.6415	14.7777
13	0.00346415	14.6126	15.0289		13	5.61605e-05	14.6126	14.7489
14	0.00266929	14.5842	15.0032		14	4.32744e-05	14.5842	14.7205
15	0.00205682	14.5563	14.9773		15	3.33451e-05	14.5563	14.6926
16	0.00158488	14.5287	14.9513		16	2.5694e-05	14.5287	14.665
17	0.00122123	14.5014	14.9252		17	1.97985e-05	14.5014	14.6377
18	0.000941016	14.4744	14.8991		18	1.52557e-05	14.4744	14.6108
19	0.000725099	14.4477	14.8732		19	1.17553e-05	14.4477	14.5841
20	0.000558724	14.4212	14.8473		20	9.05801e-06	14.4212	14.5576
Configuration	Straw PyC with Basanite
Label	S-P + Ba
low pCO2					high pCO2
Year	IC-sink	PyC-sink	Total C-sink		Year	IC-sink	PyC-sink	Total C-sink
0*	0	16.116	16.116		0*	0	16.116	16.116
0.5*	0.2045	11.6104	11.8149		0.5*	0.220544	11.6104	11.8309
1	0.0306787	11.5093	11.7445		1	-0.0108176	11.5093	11.719
2	0.052727	11.358	11.6459		2	-0.0185921	11.358	11.5492
3	0.0406287	11.259	11.5875		3	-0.0143261	11.259	11.4358
4	0.0313064	11.191	11.5508		4	-0.011039	11.191	11.3567
5	0.0241231	11.1415	11.5254		5	-0.00850607	11.1415	11.2987
6	0.018588	11.103	11.5055		6	-0.00655435	11.103	11.2537
7	0.014323	11.0712	11.488		7	-0.00505044	11.0712	11.2168
8	0.0110366	11.0434	11.4713		8	-0.00389161	11.0434	11.1851
9	0.00850421	11.018	11.4544		9	-0.00299868	11.018	11.1568
10	0.00655291	10.9942	11.4372		10	-0.00231063	10.9942	11.1307
11	0.00504934	10.9715	11.4195		11	-0.00178045	10.9715	11.1062
12	0.00389076	10.9494	11.4013		12	-0.00137193	10.9494	11.0827
13	0.00299802	10.9278	11.3827		13	-0.00105714	10.9278	11.06
14	0.00231012	10.9066	11.3638		14	-0.000814575	10.9066	11.038
15	0.00178006	10.8857	11.3447		15	-0.00062767	10.8857	11.0165
16	0.00137163	10.865	11.3254		16	-0.00048365	10.865	10.9953
17	0.0010569	10.8446	11.306		17	-0.000372676	10.8446	10.9745
18	0.000814397	10.8244	11.2866		18	-0.000287165	10.8244	10.9541
19	0.000627532	10.8044	11.2673		19	-0.000221275	10.8044	10.9339
20	0.000483544	10.7847	11.248		20	-0.000170503	10.7847	10.9139
Configuration	Wood PyC
Label	W-P
low pCO2					high pCO2
Year	IC-sink	PyC-sink	Total C-sink		Year	IC-sink	PyC-sink	Total C-sink
0*	0	37.092	37.092		0*	0	37.092	37.092
0.5*	0.314153	30.9007	31.2149		0.5*	0.240037	30.9007	31.1408
1	-0.0115447	30.6318	30.9344		1	-0.0378582	30.6318	30.834
2	-0.0198418	30.2291	30.5119		2	-0.0650663	30.2291	30.3663
3	-0.0152891	29.9655	30.233		3	-0.0501368	29.9655	30.0525
4	-0.011781	29.7845	30.0402		4	-0.0386328	29.7845	29.8329
5	-0.00907782	29.6527	29.8994		5	-0.0297685	29.6527	29.6713
6	-0.0069949	29.5504	29.79		6	-0.0229381	29.5504	29.546
7	-0.00538992	29.4657	29.6999		7	-0.0176749	29.4657	29.4436
8	-0.00415319	29.3917	29.6217		8	-0.0136194	29.3917	29.356
9	-0.00320024	29.3242	29.5511		9	-0.0104944	29.3242	29.2781
10	-0.00246594	29.261	29.4854		10	-0.00808645	29.261	29.2067
11	-0.00190013	29.2004	29.4229		11	-0.006231	29.2004	29.1399
12	-0.00146414	29.1416	29.3626		12	-0.00480129	29.1416	29.0763
13	-0.00112819	29.0841	29.304		13	-0.00369963	29.0841	29.0151
14	-0.000869327	29.0276	29.2467		14	-0.00285075	29.0276	28.9558
15	-0.000669859	28.972	29.1903		15	-0.00219664	28.972	28.8979
16	-0.000516159	28.917	29.1349		16	-0.00169262	28.917	28.8413
17	-0.000397726	28.8627	29.0801		17	-0.00130424	28.8627	28.7857
18	-0.000306467	28.8089	29.0261		18	-0.00100498	28.8089	28.7309
19	-0.000236148	28.7558	28.9727		19	-0.00077439	28.7558	28.677
20	-0.000181964	28.7031	28.9199		20	-0.000596705	28.7031	28.6237
Configuration	Straw PyC
Label	S-P
low pCO2					high pCO2
Year	IC-sink	PyC-sink	Total C-sink		Year	IC-sink	PyC-sink	Total C-sink
0*	0	32.076	32.076		0*	0	32.076	32.076
0.5*	0.380764	23.1083	23.4891		0.5*	0.423236	23.1083	23.5316
1	0.030422	22.9072	23.3184		1	-0.0363837	22.9072	23.2941
2	0.0522859	22.6061	23.0696		2	-0.0625321	22.6061	22.9304
3	0.0402888	22.409	22.9127		3	-0.0481841	22.409	22.6851
4	0.0310445	22.2736	22.8084		4	-0.0371282	22.2736	22.5126
5	0.0239213	22.1751	22.7338		5	-0.0286091	22.1751	22.3855
6	0.0184326	22.0985	22.6757		6	-0.0220447	22.0985	22.2868
7	0.0142032	22.0352	22.6265		7	-0.0169865	22.0352	22.2065
8	0.0109442	21.9798	22.5821		8	-0.0130889	21.9798	22.1381
9	0.00843308	21.9294	22.5401		9	-0.0100857	21.9294	22.0776
10	0.0064981	21.8821	22.4993		10	-0.0077715	21.8821	22.0225
11	0.0050071	21.8368	22.459		11	-0.00598832	21.8368	21.9712
12	0.00385822	21.7928	22.4189		12	-0.00461429	21.7928	21.9226
13	0.00297294	21.7498	22.3789		13	-0.00355554	21.7498	21.8761
14	0.0022908	21.7076	22.339		14	-0.00273972	21.7076	21.8311
15	0.00176517	21.666	22.2991		15	-0.00211109	21.666	21.7874
16	0.00136015	21.6249	22.2593		16	-0.00162669	21.6249	21.7446
17	0.00104806	21.5842	22.2198		17	-0.00125345	21.5842	21.7028
18	0.000807584	21.544	22.1804		18	-0.000965843	21.544	21.6616
19	0.000622283	21.5043	22.1412		19	-0.000744229	21.5043	21.6211
20	0.0004795	21.4649	22.1024		20	-0.000573465	21.4649	21.5812
Configuration	Basanite
Label	Ba
low pCO2					high pCO2
Year	IC-sink	PyC-sink	Total C-sink		Year	IC-sink	PyC-sink	Total C-sink
0*	0	n.a.	0		0*	0	n.a.	0
0.5*	0.0133609	n.a.	0.0133609		0.5*	-0.096221	n.a.	-0.096221
1	0.0567325	n.a.	0.0700933		1	0.125217	n.a.	0.0289962
2	0.0975053	n.a.	0.167599		2	0.215209	n.a.	0.244205
3	0.0751326	n.a.	0.242731		3	0.165829	n.a.	0.410034
4	0.0578934	n.a.	0.300625		4	0.127779	n.a.	0.537814
5	0.0446097	n.a.	0.345234		5	0.0984603	n.a.	0.636274
6	0.0343739	n.a.	0.379608		6	0.0758684	n.a.	0.712142
7	0.0264868	n.a.	0.406095		7	0.0584603	n.a.	0.770603
8	0.0204094	n.a.	0.426504		8	0.0450466	n.a.	0.815649
9	0.0157264	n.a.	0.442231		9	0.0347106	n.a.	0.85036
10	0.012118	n.a.	0.454349		10	0.0267462	n.a.	0.877106
11	0.00933749	n.a.	0.463686		11	0.0206092	n.a.	0.897715
12	0.00719499	n.a.	0.470881		12	0.0158804	n.a.	0.913596
13	0.00554409	n.a.	0.476425		13	0.0122367	n.a.	0.925832
14	0.00427199	n.a.	0.480697		14	0.00942894	n.a.	0.935261
15	0.00329178	n.a.	0.483989		15	0.00726546	n.a.	0.942527
16	0.00253648	n.a.	0.486526		16	0.00559839	n.a.	0.948125
17	0.00195448	n.a.	0.48848		17	0.00431383	n.a.	0.952439
18	0.00150602	n.a.	0.489986		18	0.00332402	n.a.	0.955763
19	0.00116046	n.a.	0.491147		19	0.00256132	n.a.	0.958324
20	0.000894194	n.a.	0.492041		20	0.00197362	n.a.	0.960298

## Sheet: Grain Size Dist. Soil
Grain size distribution soil
Class	mm	wt%
Coarse sand	2 - 0.63	2.5
Middle sand	0.63 - 0.2	8.7
Fine sand	0.2 - 0.125	4.4
	0.125 - 0.063	3.7
Coars silt	0.063 - 0.02	16.6
Middle silt	0.02 - 0.0063	14.2
Fine silt	0.0063 - 0.002	7.3
Clay	< 0.002	42.6

## Sheet: Calculation Basanite CDR
Major cations in Basanite
Element	wt%	Molar mass g mol-1	XO/MXO
MgO	8.21	40.3	0.203722
CaO	11.63	56.1	0.207308
Na2O	3.26	62	0.0525806
K2O	3.35	94.2	0.0355626					Coefficients α, β, γ, δ, ε, and θ consider the relative contribution of each oxide (α, β, ε, and θ are equal to 1, γ is equal to −1, and δ is equal to −2 for the pH range of the ocean); η is molar ratio of $CO_2$ to divalent cation sequestered during EW (equivalent to 1.4–1.7 for the ocean’s temperature, pressure, and salinity ranges).
P2O5	0.6	283.9	0.00211342
Sum			0.494947
			370.22	kg CO2 per tonne rock
